# Supplementary material for: Existence of untypical halogen-involving interactions in crystal packings: a statistical and first-principles study
Source: Royal Society of Chemistry journal article supplement (doi:10.1039/c9ce01885a), 2020-01-01
Supplement: c9ce01885a1.pdf [file c9ce01885a1.pdf]

**supporting- Existence of untypical halogen-involved interactions in crystal packings:  
A statistical and first-principles study**

Yaser Balmohammadi,<sup>1</sup> Hamid Reza Khavasi,<sup>1</sup> and S.Shahab Naghavi<sup>2</sup>

<sup>1</sup>*Department of Inorganic Chemistry and Catalysis,  
Shahid Beheshti University, General Campus, Evin, Tehran 1983963113, Iran*

<sup>2</sup>*Department of Physical and Computational Chemistry,  
Shahid Beheshti University, G.C., Evin, 1983963113 Tehran, Iran*

(Dated: January 31, 2020)

## CSD SEARCH

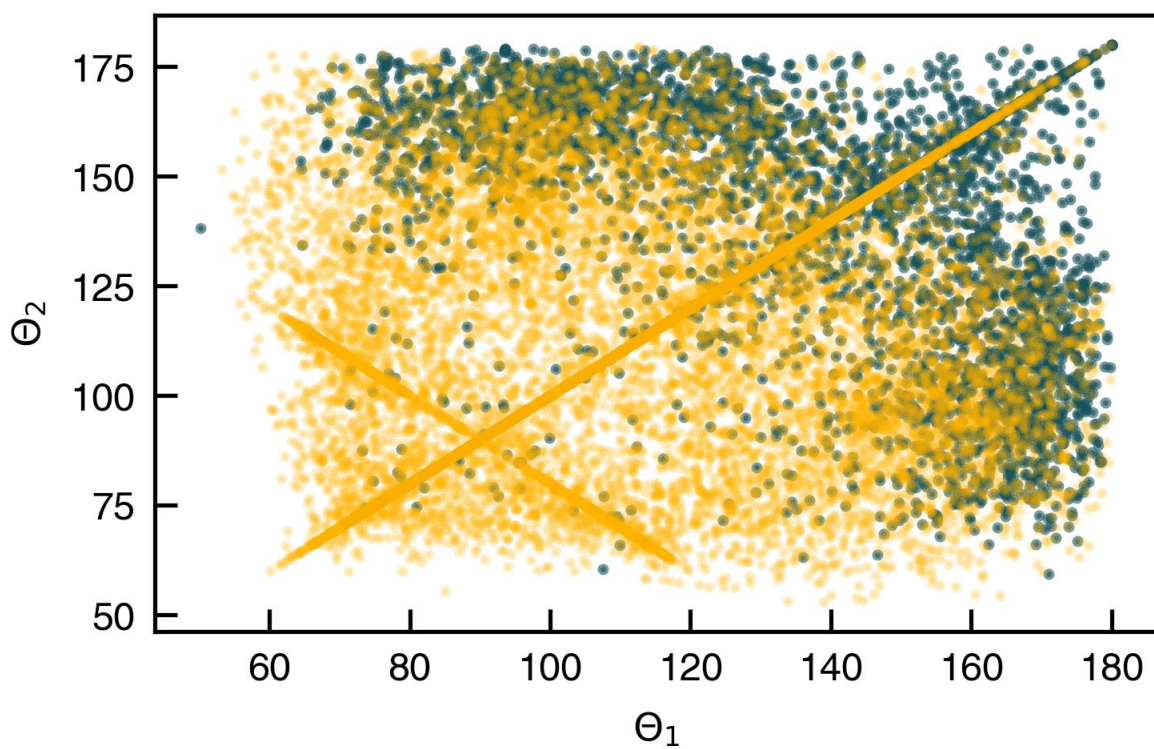

Figure 1: Scatter plot for searching at up to 10% more than the sum of the van der Waals radii of (C-Br...Br-C) which covers the (Br...Br < 4.07Å) range. Blue points stand for contacts with less than the sum of the van der Waals radii and golden points stand for contacts with up to 10% more than the sum of the van der Waals radii.

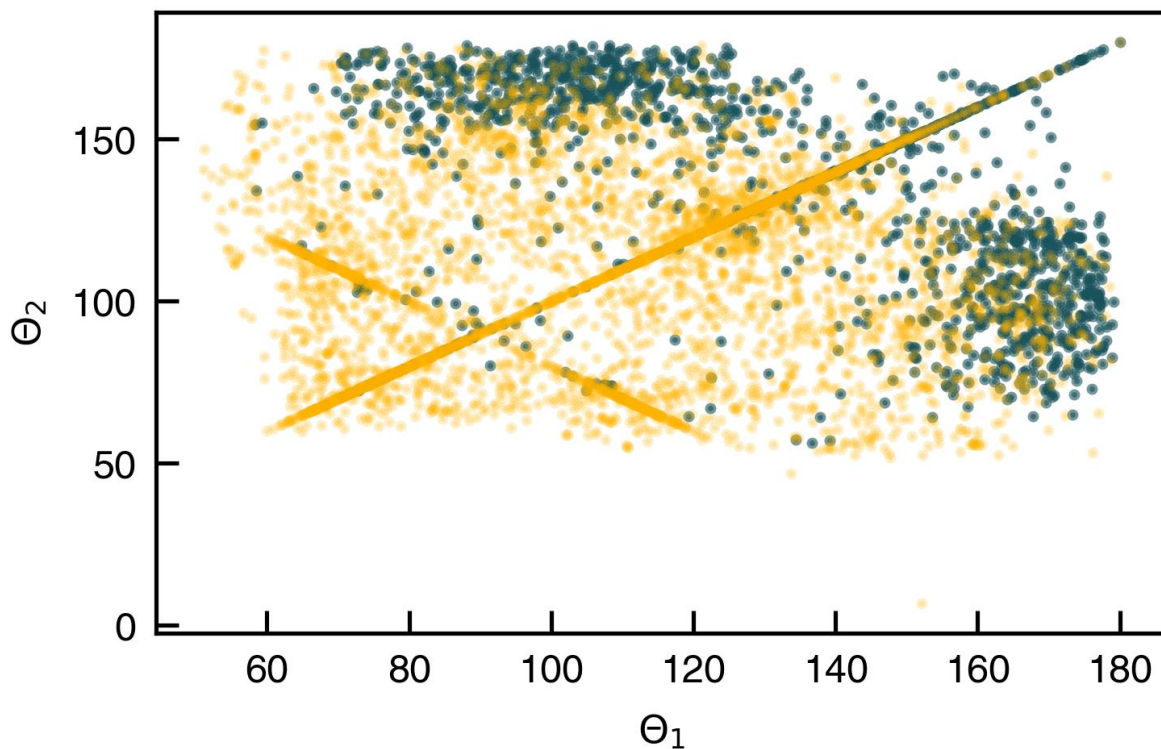

Figure 2: Scatter plot for searching at up to 10% more than the sum of the van der Waals radii of (C-I $\cdots$ I-C) which covers the (I $\cdots$ I < 4.36Å) range. Blue points stand for contacts with less than the sum of the van der Waals radii and golden points stand for contacts with up to 10% more than the sum of the van der Waals radii.

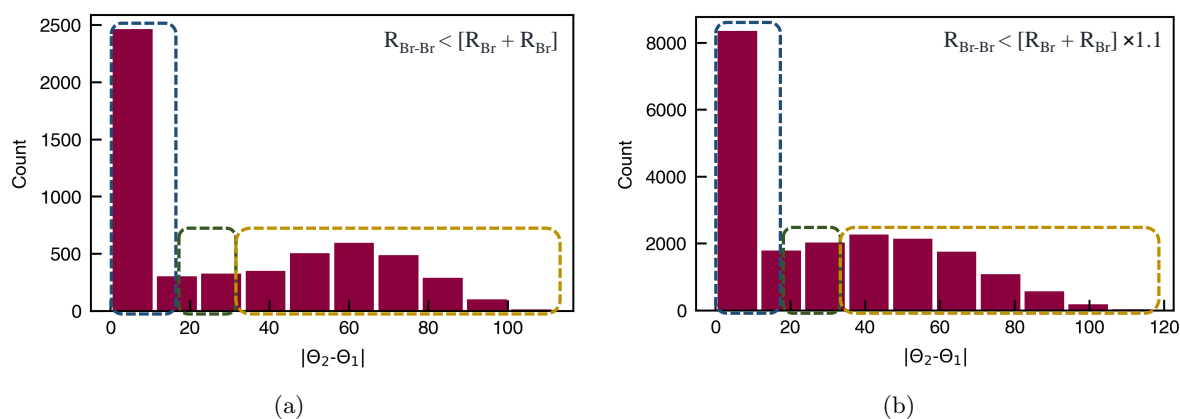

Figure 3: Bar chart of (C-Br $\cdots$ Br-C) (a) searching at less than the sum of the van der Waals radii which covers the (Br $\cdots$ Br < 3.70Å) range (b) Bar chart of (C-Br $\cdots$ Br-C) for searching at up to 10% more than the sum of the van der Waals radii of (Br $\cdots$ Br) which covers the (Br $\cdots$ Br < 4.07Å) range. The domain with the golden dots line indicates type II interaction, the domain with the blue dots line indicates type I and the domain with the green dots line indicate quasi-type I interactions.

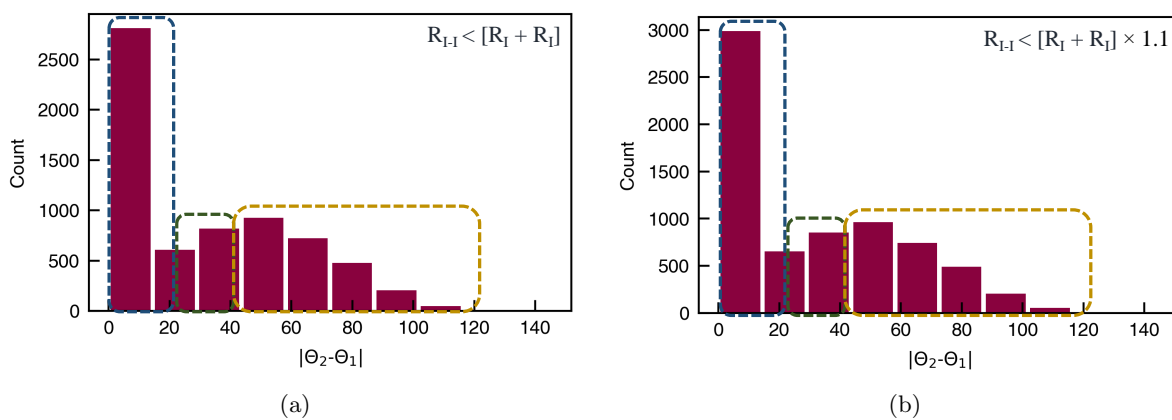

Figure 4: Bar chart of (C-I...I-C) (a) searching at less than the sum of the van der Waals radii which covers the (I...I  $< 3.96\text{\AA}$ ) range (b) Bar chart of (C-I...I-C) for searching at up to 10% more than the sum of the van der Waals radii of (I...I) which covers the (I...I  $< 4.36\text{\AA}$ ) range. The domain with the golden dots line indicates type II interaction, the domain with the blue dots line indicates type I and the domain with the green dots line indicate quasi-type I interactions.

### COUPLES PICTURES

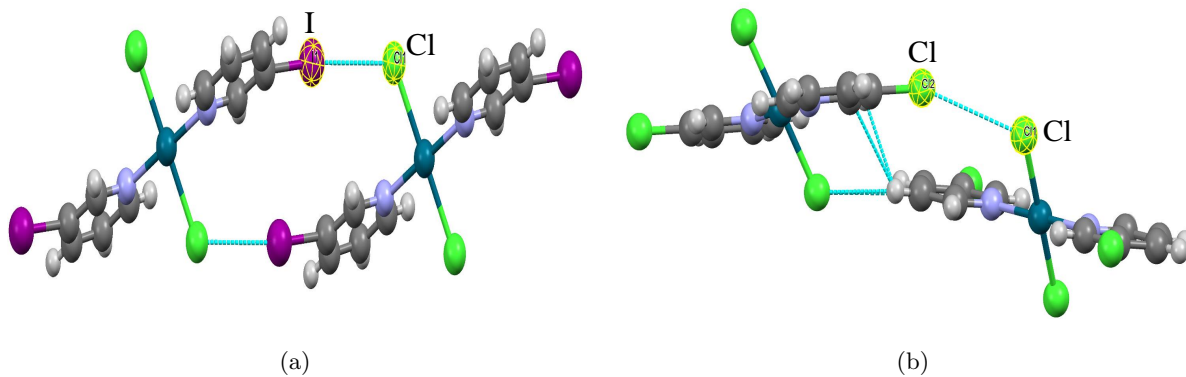

Figure 5: Dimers contain halogen-involved interactions of cop4; (a) cop4-I dimer involved I...Cl interaction (b) cop2-Cl dimer involved Cl...Cl interaction

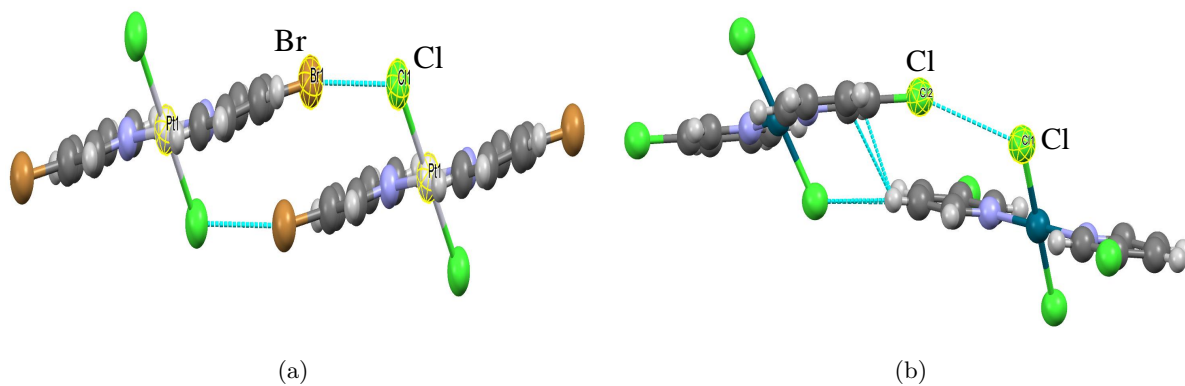

Figure 6: Dimers contain halogen-involved interactions of cop5; (a) cop5-Br dimer involved Br $\cdots$ Cl interaction (b) cop5-Cl dimer involved Cl $\cdots$ Cl interaction

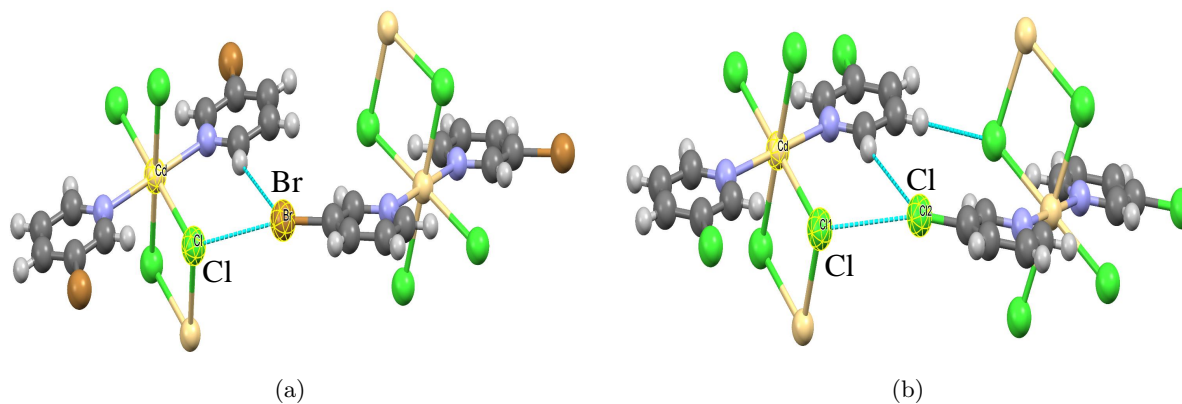

Figure 7: Dimers with halogen-involved interactions of cop6; (a) cop6-Br dimer involved Br $\cdots$ Cl interaction (b) cop6-Cl dimer involved Cl $\cdots$ Cl interactions

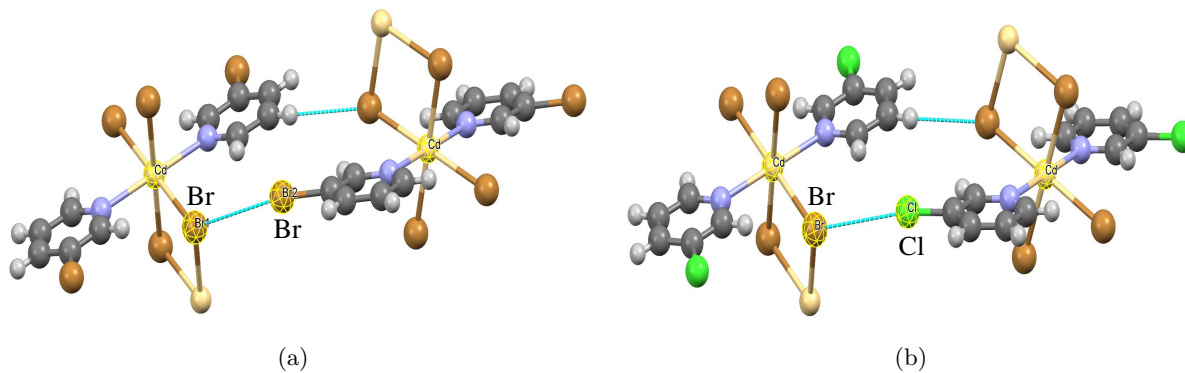

Figure 8: Dimers with halogen-involved interactions of cop7; (a) cop7-Br dimer involved Br $\cdots$ Br interaction (b) cop7-Cl dimer involved Br $\cdots$ Cl interaction

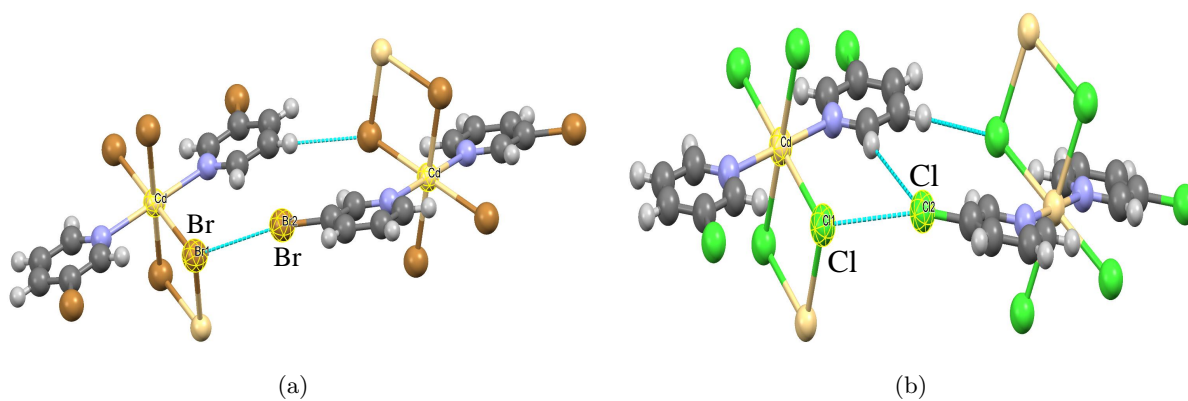

Figure 9: Dimers with halogen-involved interactions of cop8; (a) cop8-Br dimer involved Br $\cdots$ Br interaction (b) cop8-Cl dimer involved Cl $\cdots$ Cl interaction

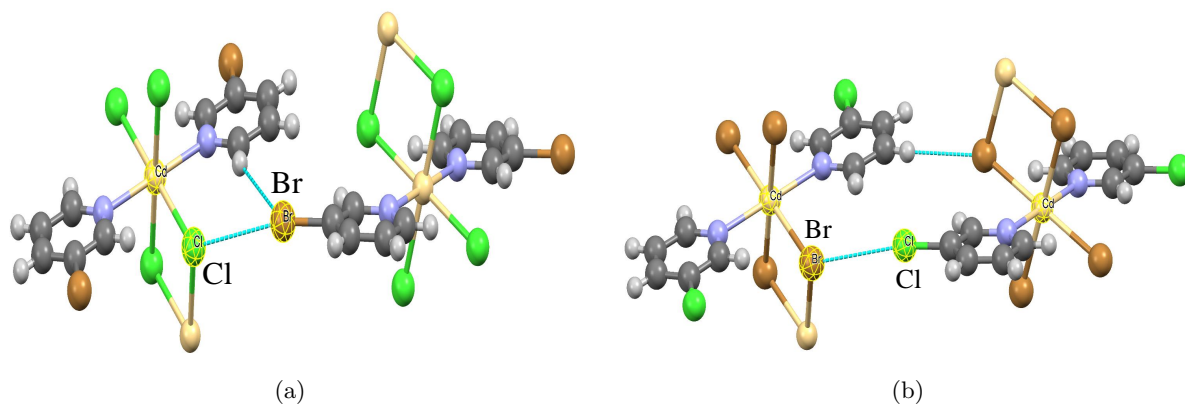

Figure 10: Dimers with halogen-involved interactions of cop9; (a) cop9-Br dimer involved Br $\cdots$ Cl interaction (b) cop9-Cl dimer involved Br $\cdots$ Cl interaction

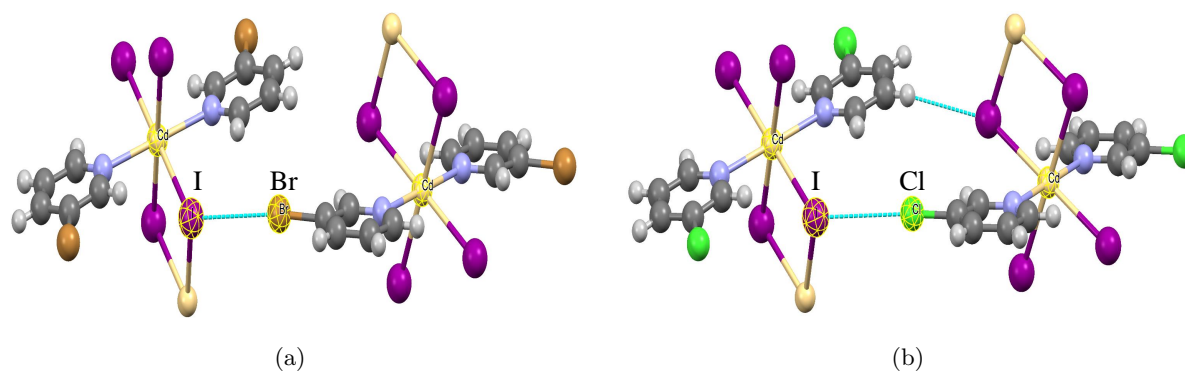

Figure 11: Dimers with halogen-involved interactions of cop10; (a) cop10-Br dimer involved Br $\cdots$ Br interaction (b) cop10-Cl dimer involved Cl $\cdots$ Cl interaction

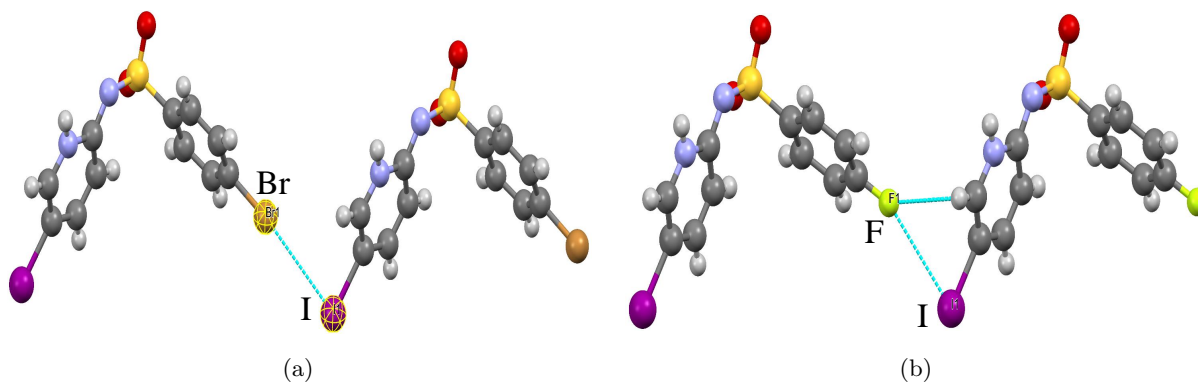

Figure 12: Dimers with halogen-involved interactions of cop11; (a) cop11-Br dimer involved Br $\cdots$ I interaction (b) cop11-F dimer involved F $\cdots$ I interaction

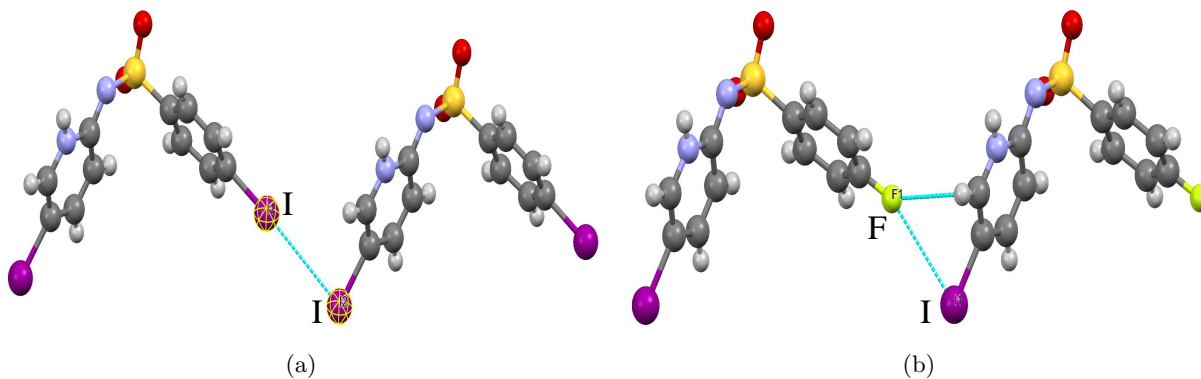

Figure 13: Dimers with halogen-involved interactions of cop12; (a) cop12-I dimer involved I $\cdots$ I interaction (b) cop12-F dimer involved I $\cdots$ F interaction

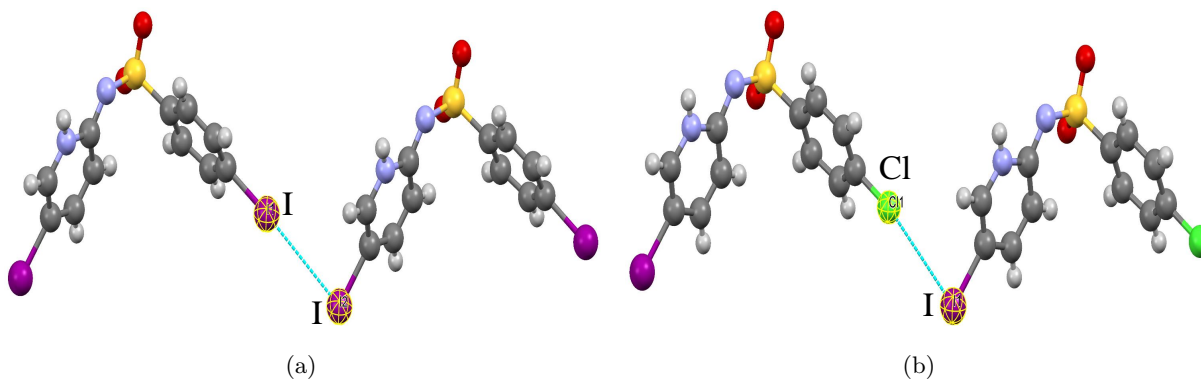

Figure 14: Dimers with halogen-involved interactions of cop13; (a) cop13-I dimer involved I $\cdots$ I interaction (b) cop13-F dimer involved I $\cdots$ F interaction

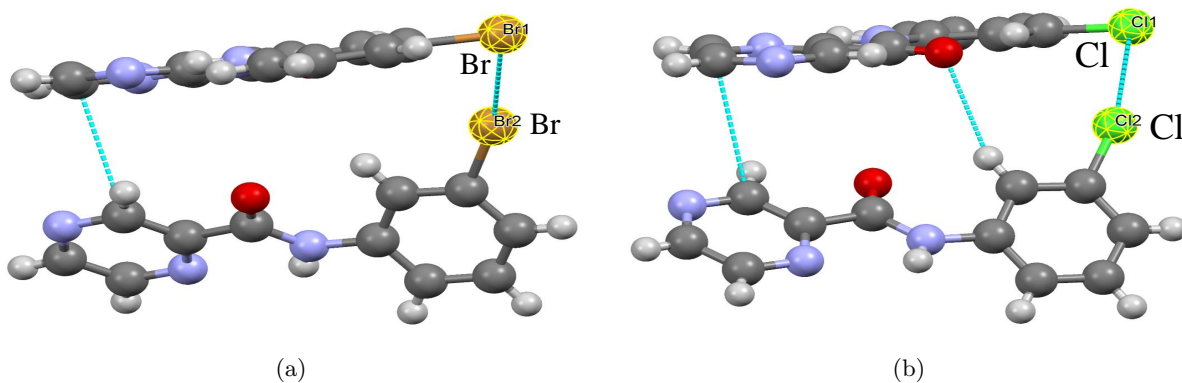

Figure 15: Dimers with halogen-involved interactions of cop14; (a) cop14-Br dimer involved Br $\cdots$ Br interaction (b) cop14-Cl dimer involved Cl $\cdots$ Cl interaction

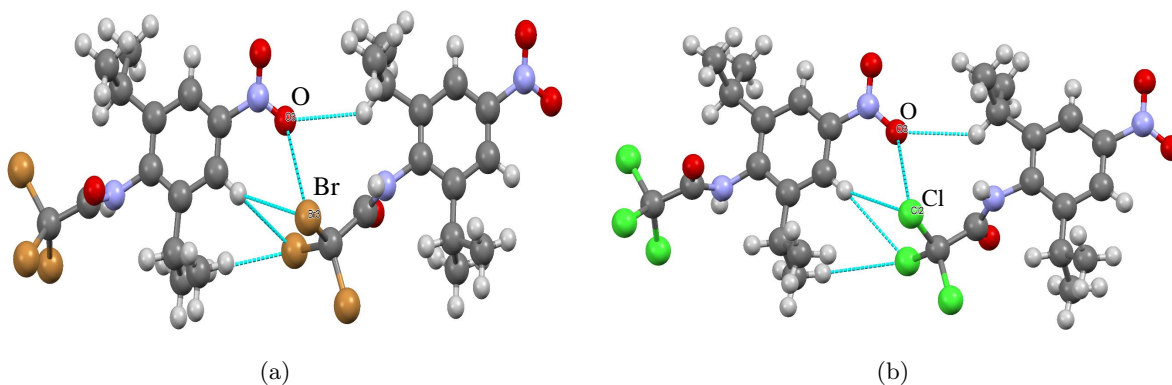

Figure 16: Dimers with halogen-involved interactions of cop15; (a) cop15-Br dimer involved Br $\cdots$ O interaction (b) cop15-Cl dimer involved Cl $\cdots$ O interaction

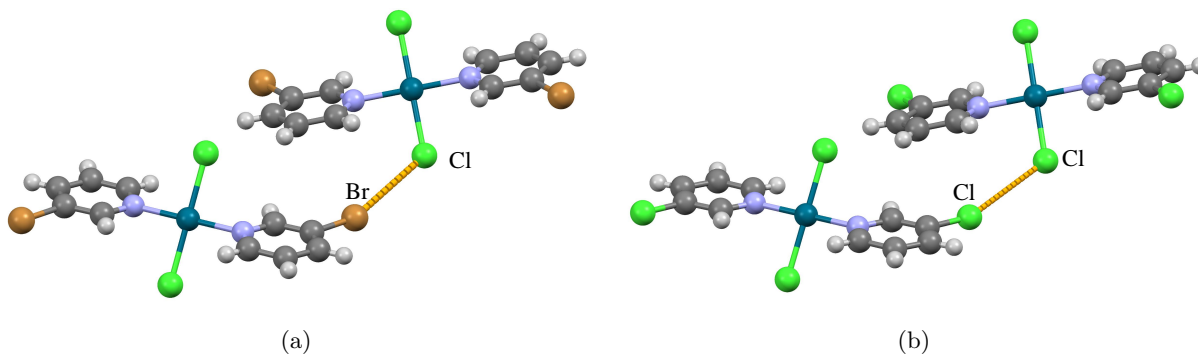

Figure 17: Dimers with halogen-involved interactions of cop16; (a) cop16-Br dimer involved Br $\cdots$ Cl interaction (b) cop16-Cl dimer involved Cl $\cdots$ Cl interaction



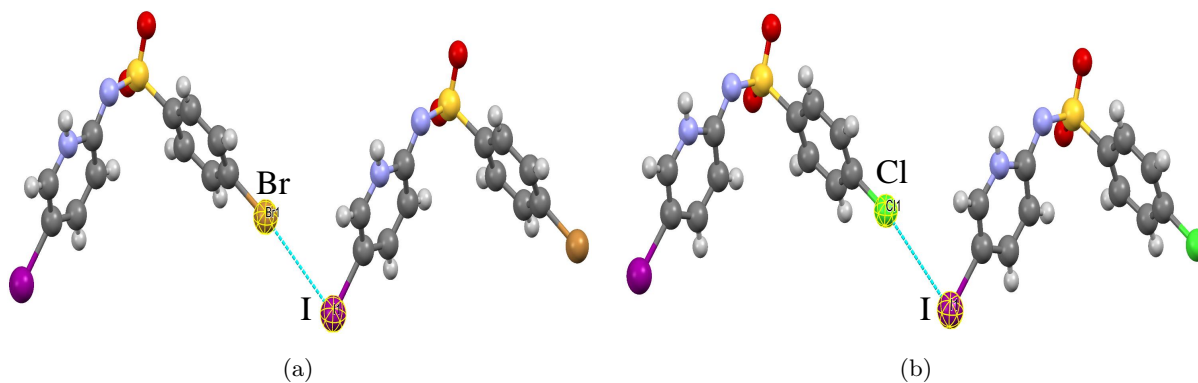

Figure 18: Dimers with halogen-involved interactions of cop17; (a) cop17-Br dimer involved Br $\cdots$ I interaction (b) cop17-Cl dimer involved Cl $\cdots$ I interaction

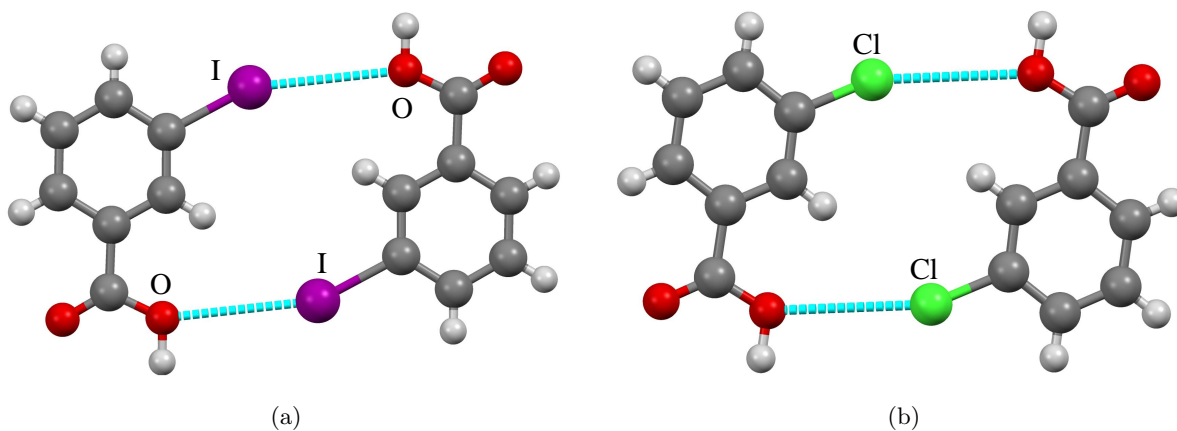

Figure 19: Dimers with halogen-involved interactions of cop18; (a) cop18-I dimer involved I $\cdots$ O interaction (b) cop18-Cl dimer involved Cl $\cdots$ O interaction

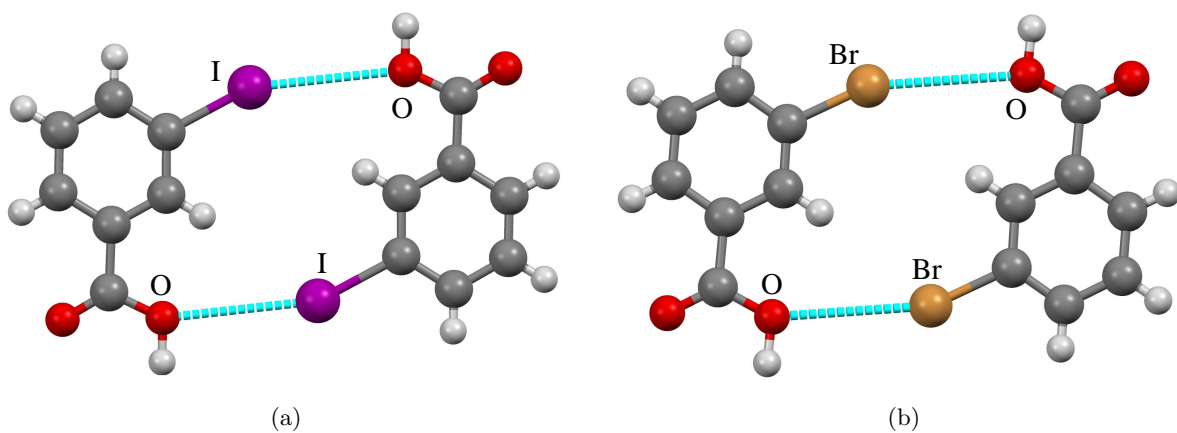

Figure 20: Dimers with halogen-involved interactions of cop19; (a) cop19-I dimer involved I $\cdots$ O interaction (b) cop19-Br dimer involved Br $\cdots$ O interaction

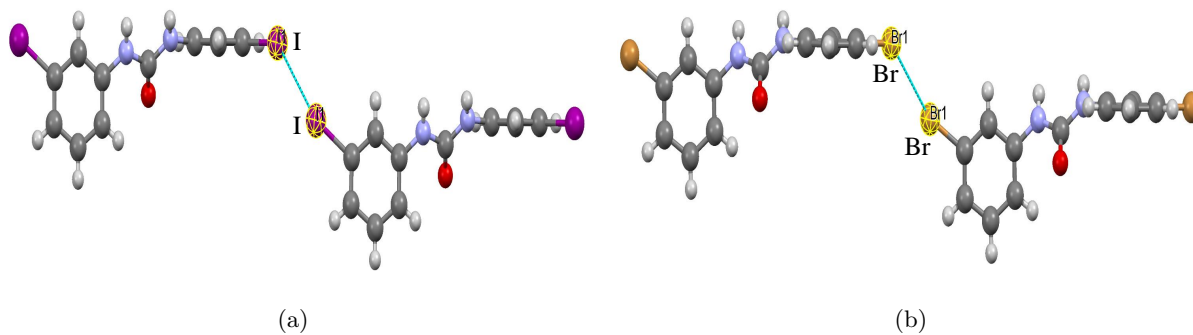

Figure 21: Dimers with halogen-involved interactions of cop20; (a) cop20-I dimer involved I $\cdots$ I interaction (b) cop20-Br dimer involved Br $\cdots$ Br interaction

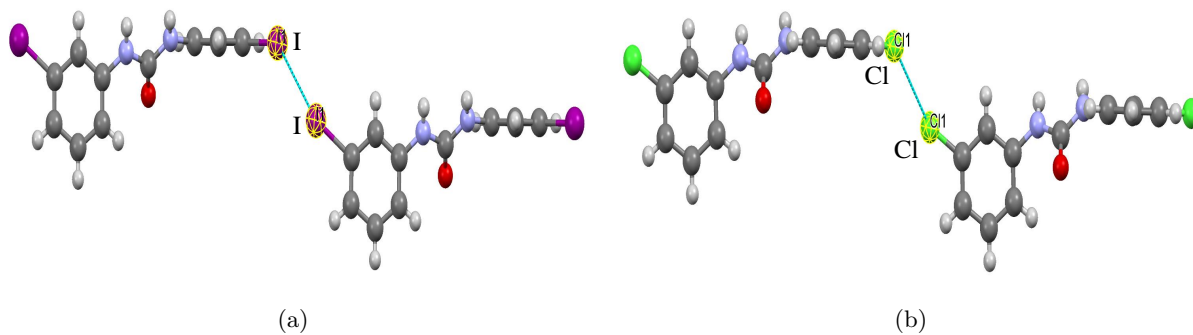

Figure 22: Dimers with halogen-involved interactions of cop21; (a) cop21-I dimer involved I $\cdots$ I interaction (b) cop21-Cl dimer involved Cl $\cdots$ Cl interaction

## HIRSHFELD FINGERPRINTS

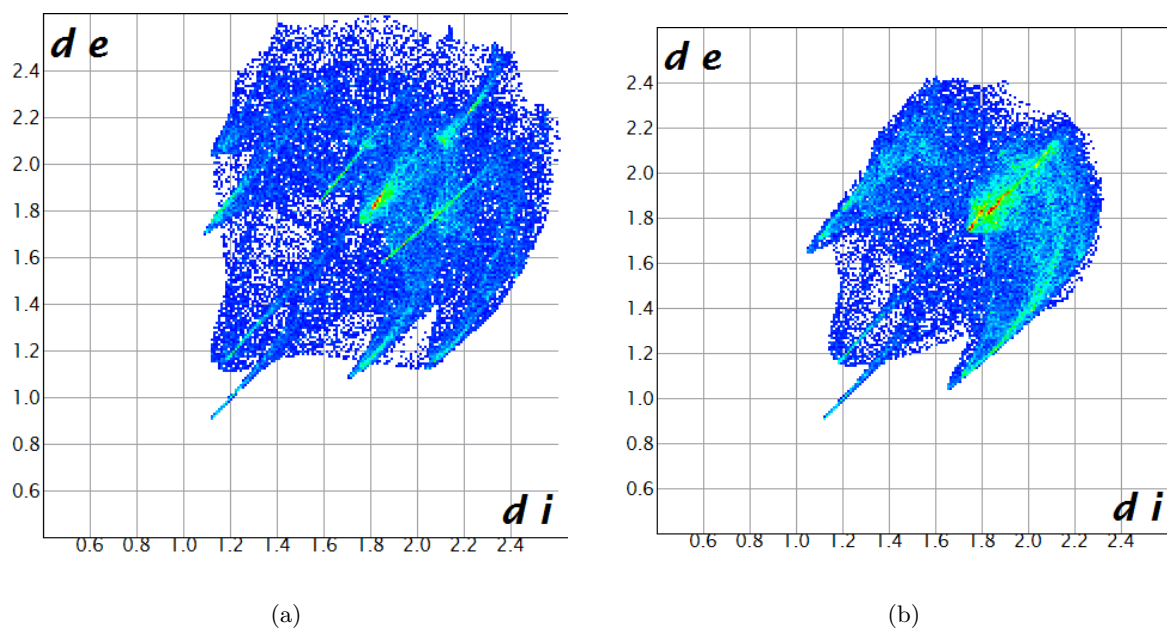

Figure 23: Hirshfeld fingerprint plots for (a) Cop4-I and (b) cop4-cl. The dissimilarity index of the two structures is  $x = 3.1$

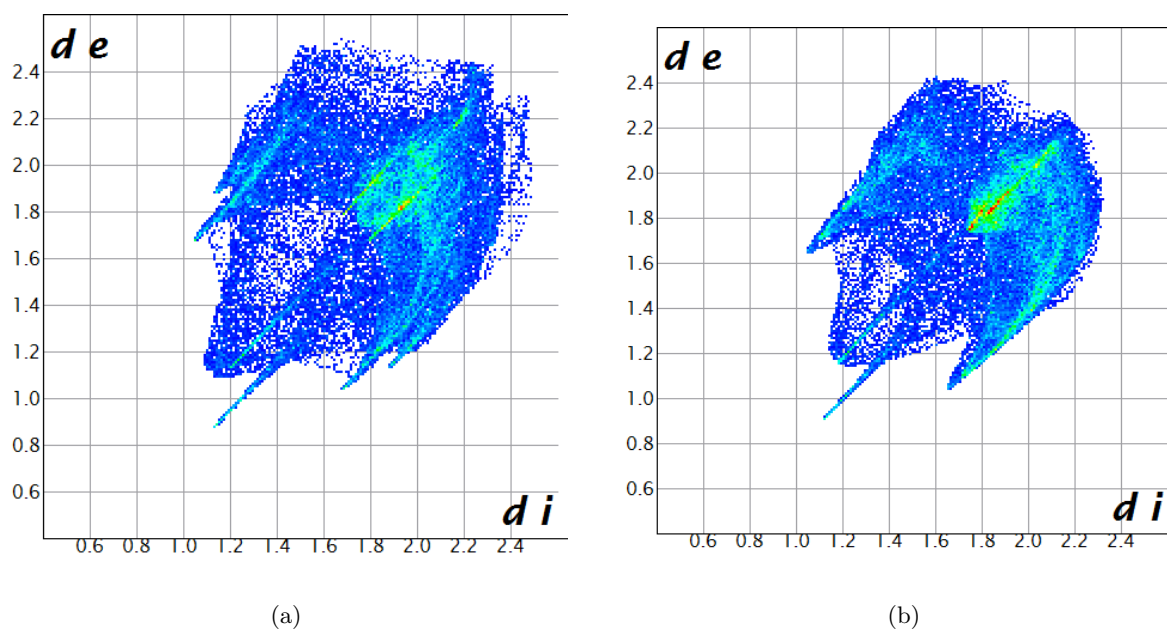

Figure 24: Hirshfeld fingerprint plots for (a) Cop5-Br and (b) cop5-Cl. The dissimilarity index of the two structures is  $x = 2.6$

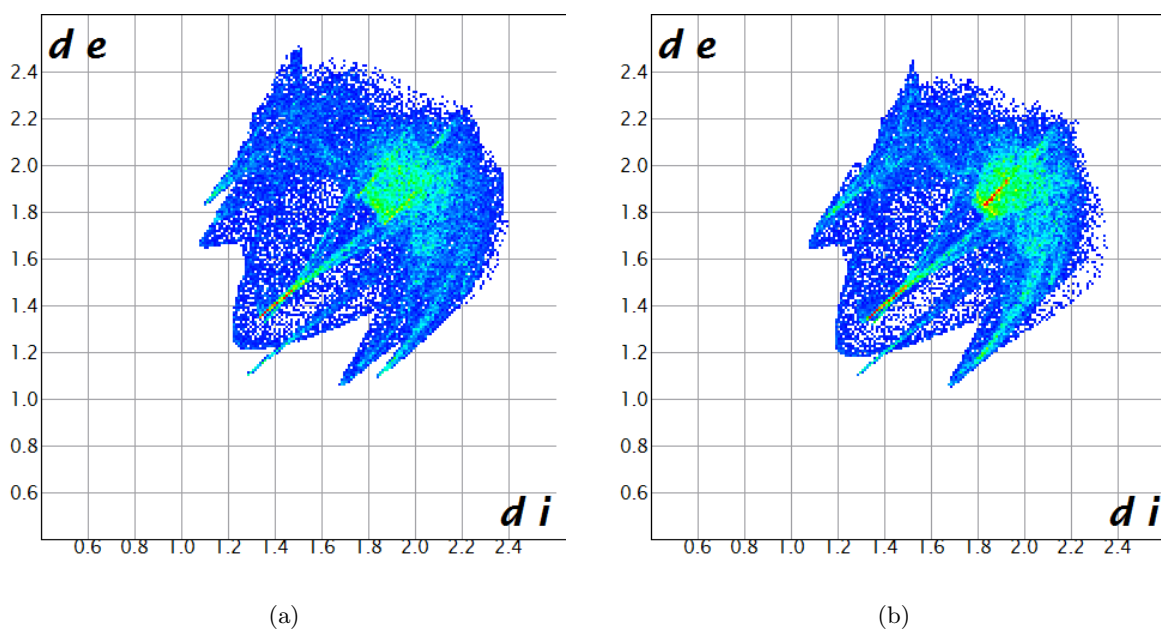

Figure 25: Hirshfeld fingerprint plots for (a) Cop6-Br and (b) cop6-Cl. The dissimilarity index of the two structures is  $x = 0.4$

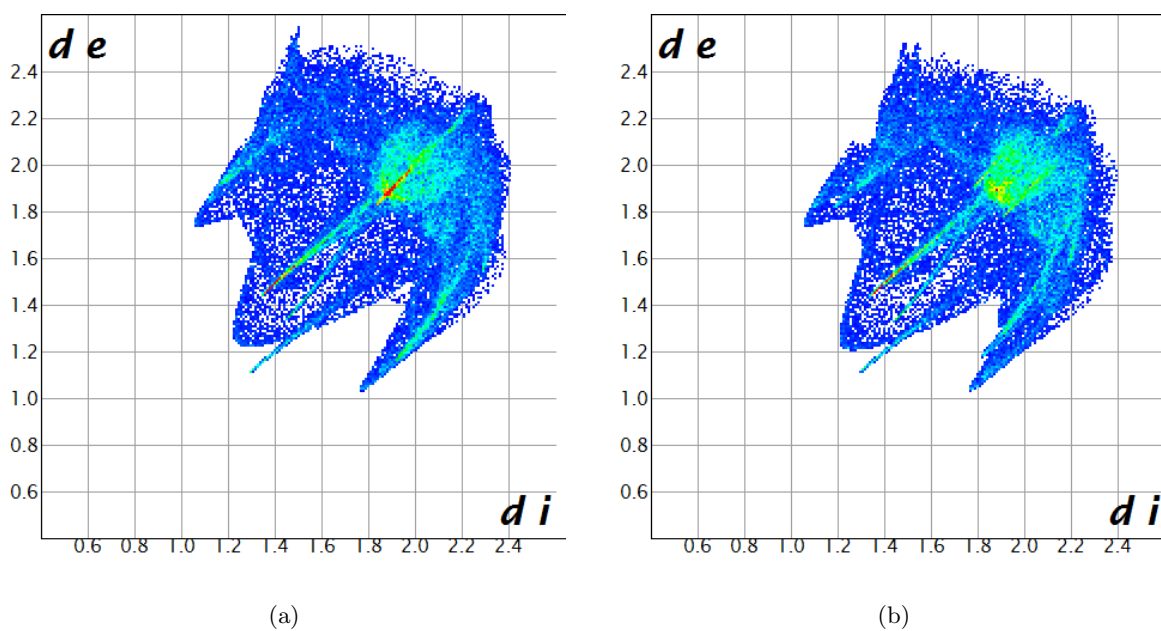

Figure 26: Hirshfeld fingerprint plots for (a) Cop7-Br and (b) cop7-Cl. The dissimilarity index of the two structures is  $x = 0.5$

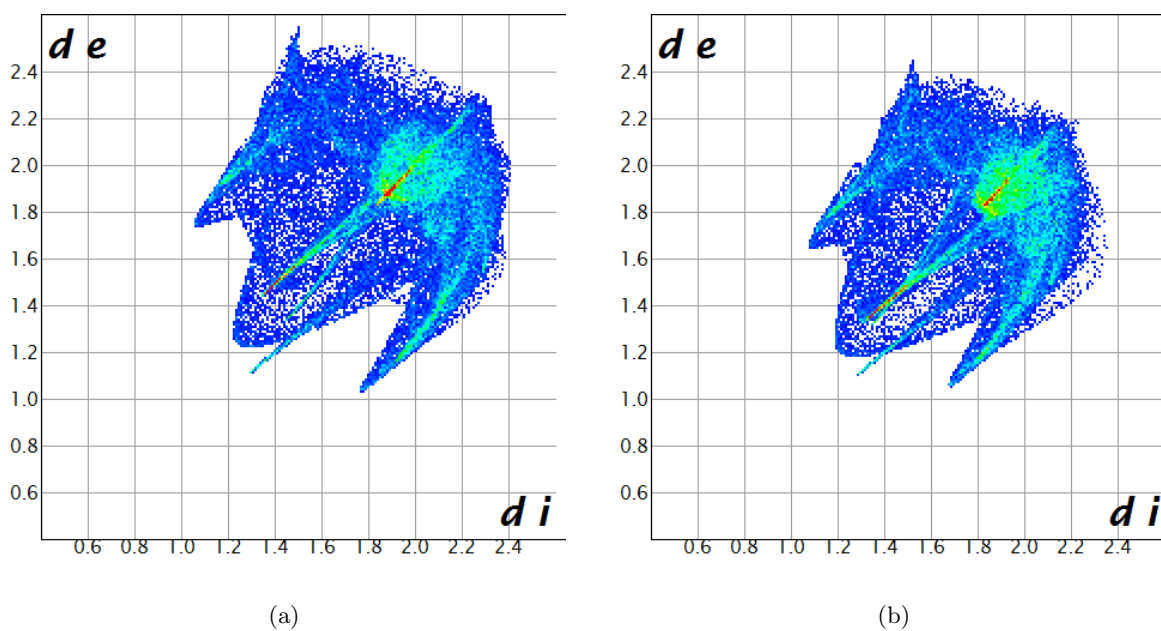

Figure 27: Hirshfeld fingerprint plots for (a) Cop8-Br and (b) cop8-Cl. The dissimilarity index of the two structures is  $x = 0.4$

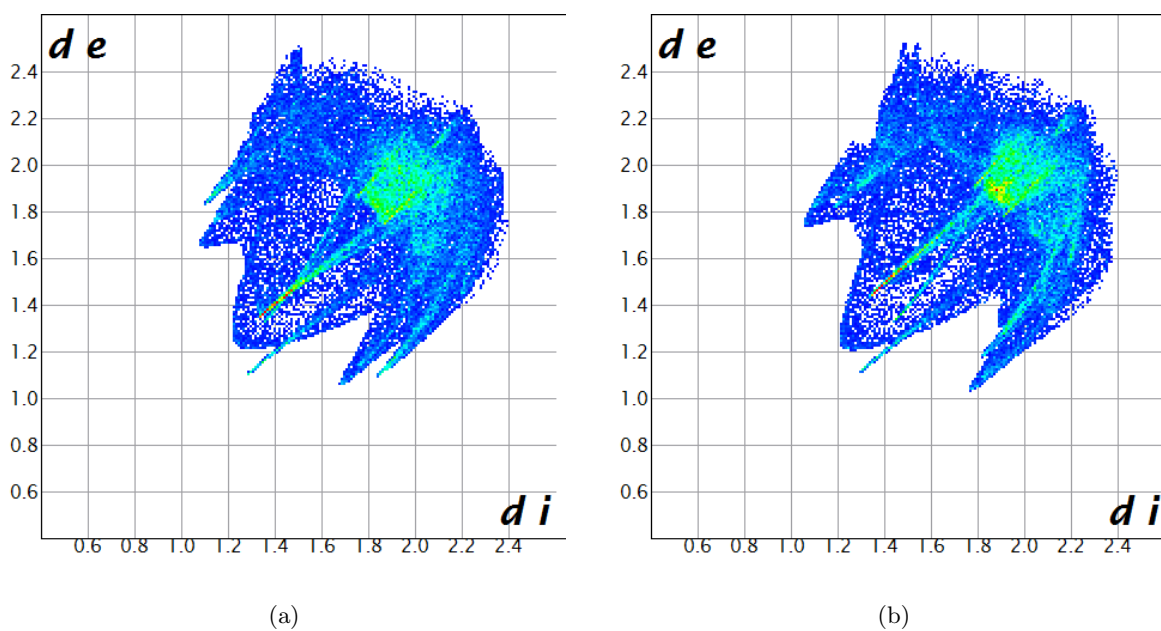

Figure 28: Hirshfeld fingerprint plots for (a) Cop9-Br and (b) cop9-Cl. The dissimilarity index of the two structures is  $x = 0.4$

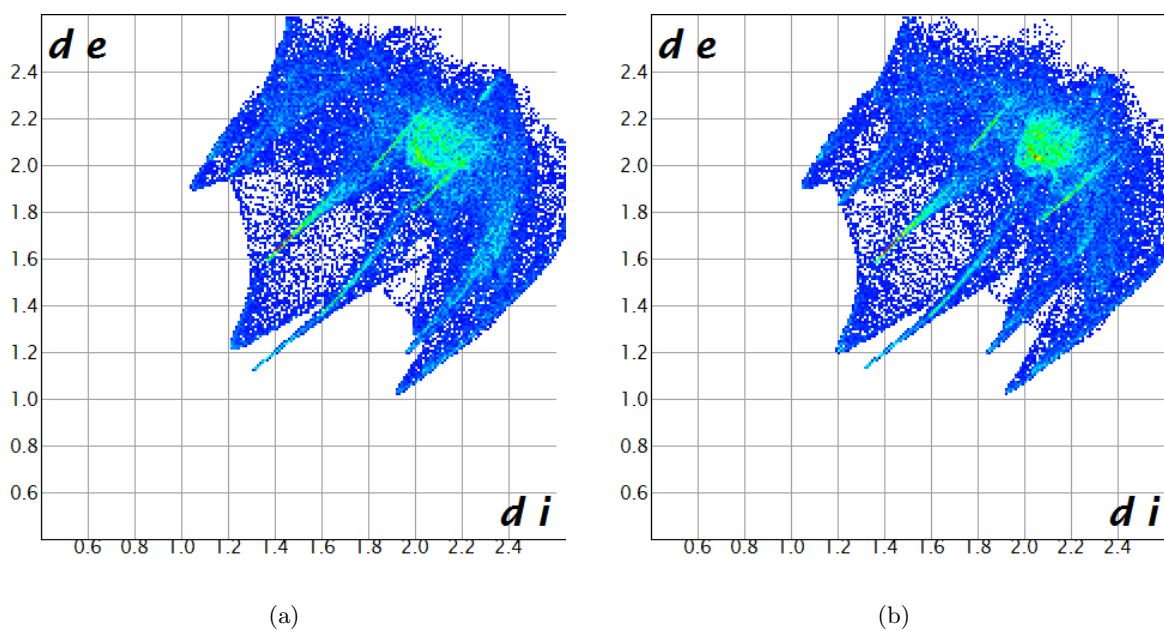

Figure 29: Hirshfeld fingerprint plots for (a) Cop10-Br and (b) cop10-Cl. The dissimilarity index of the two structures is  $x = 0.4$

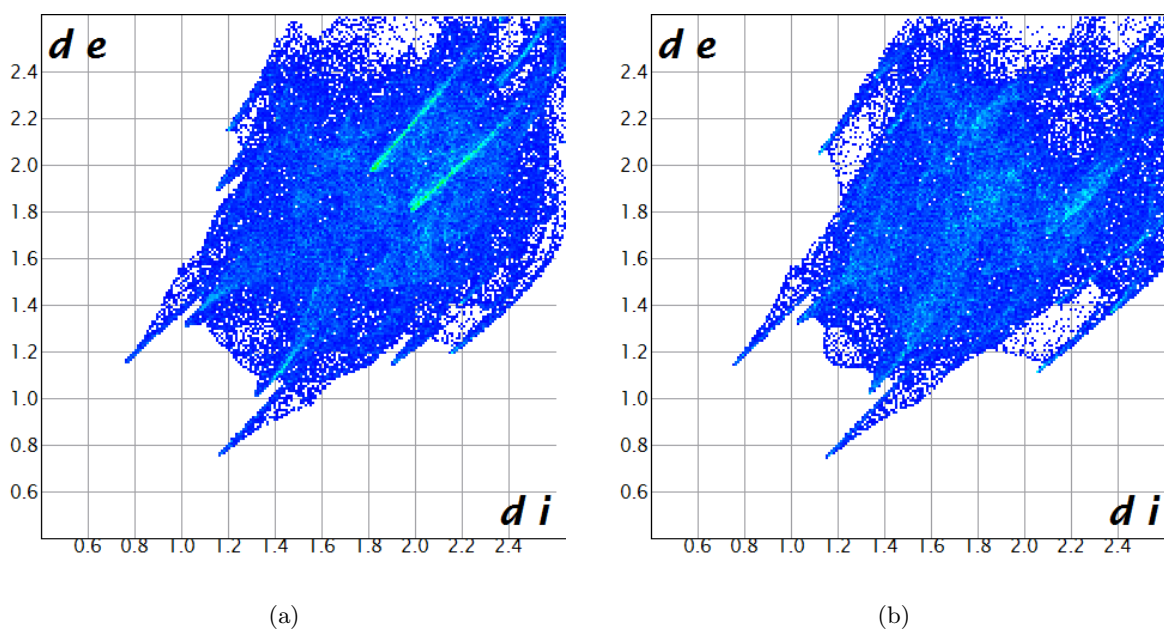

Figure 30: Hirshfeld fingerprint plots for (a) Cop11-Br and (b) cop11-F. The dissimilarity index of the two structures is  $x = 6.1$

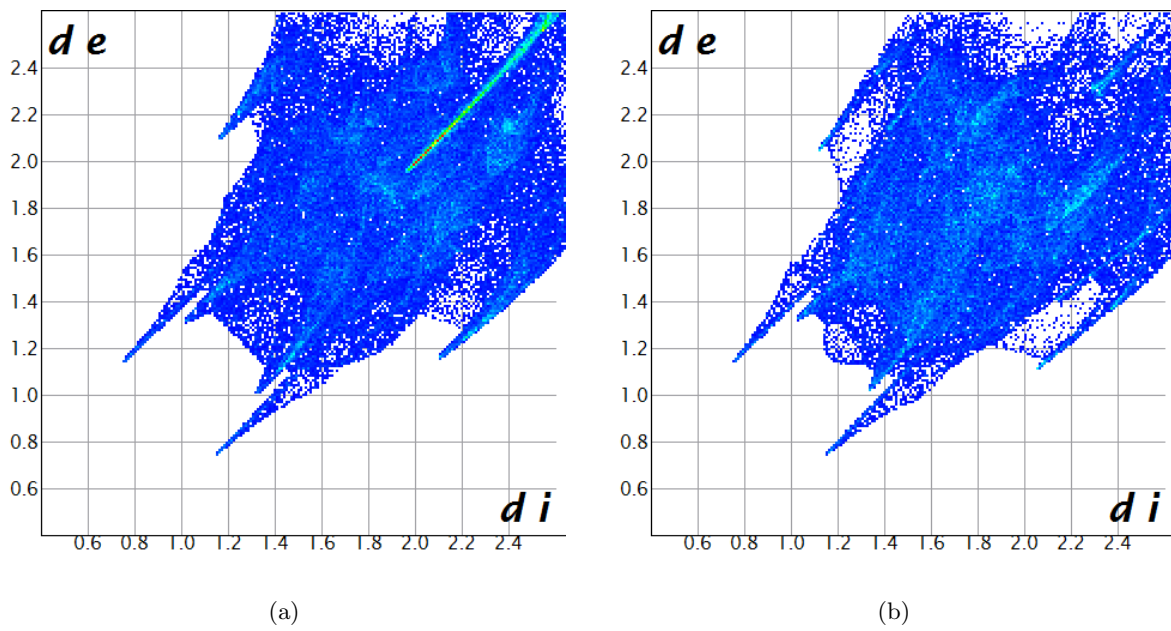

Figure 31: Hirshfeld fingerprint plots for (a) Cop12-I and (b) cop12-F. The dissimilarity index of the two structures is  $x = 6.8$

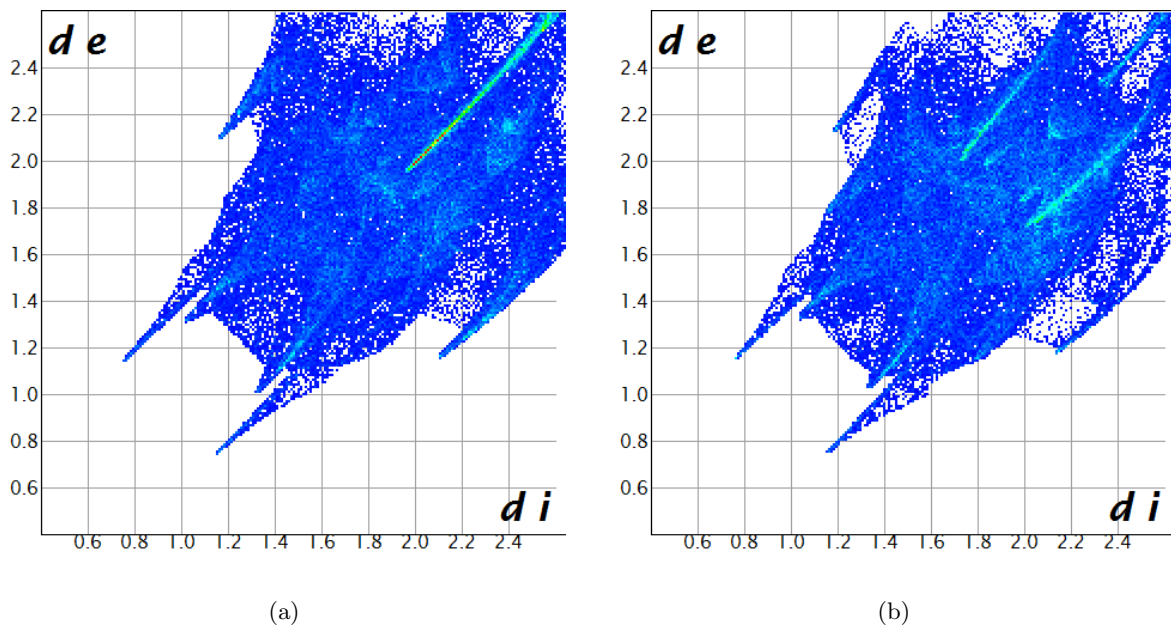

Figure 32: Hirshfeld fingerprint plots for (a) Cop13-I and (b) cop13-Cl. The dissimilarity index of the two structures is  $x = 2.1$

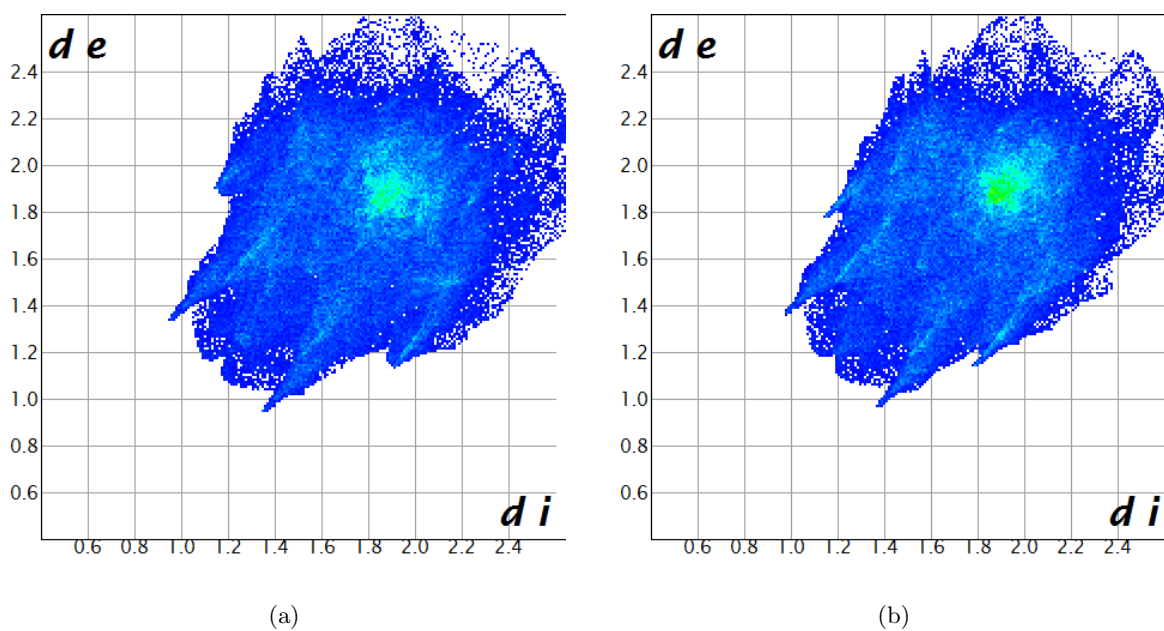

Figure 33: Hirshfeld fingerprint plots for (a) Cop14-Br and (b) cop14-Cl. The dissimilarity index of the two structures is  $x = 1.6$

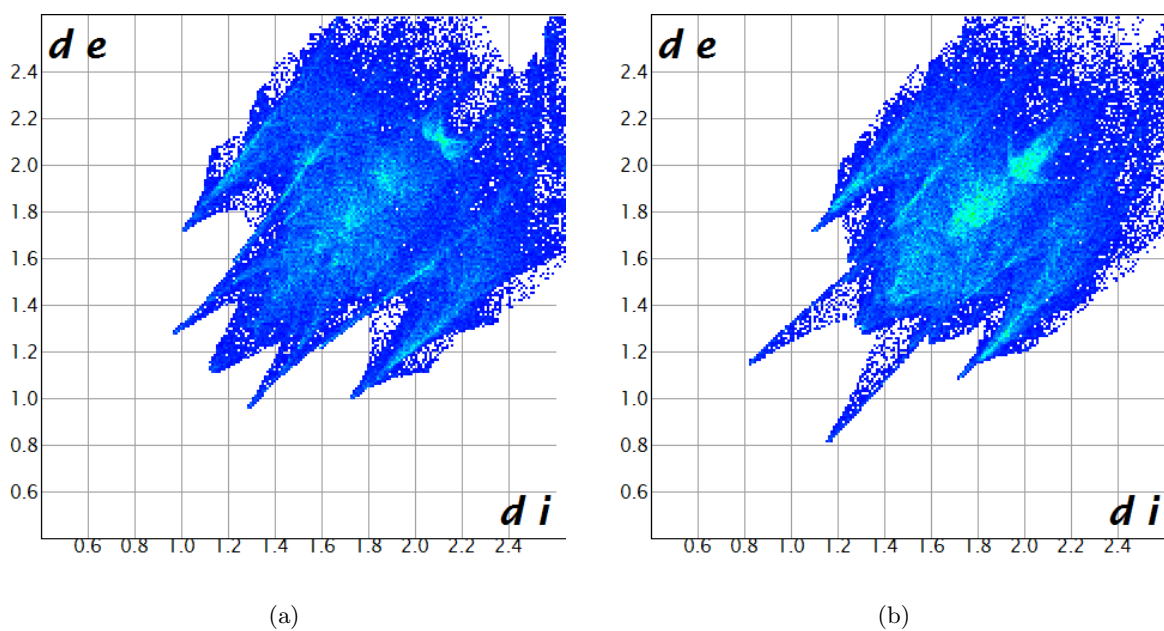

Figure 34: Hirshfeld fingerprint plots for (a) Cop15-Br and (b) cop15-Cl. The dissimilarity index of the two structures is  $x = 4.7$



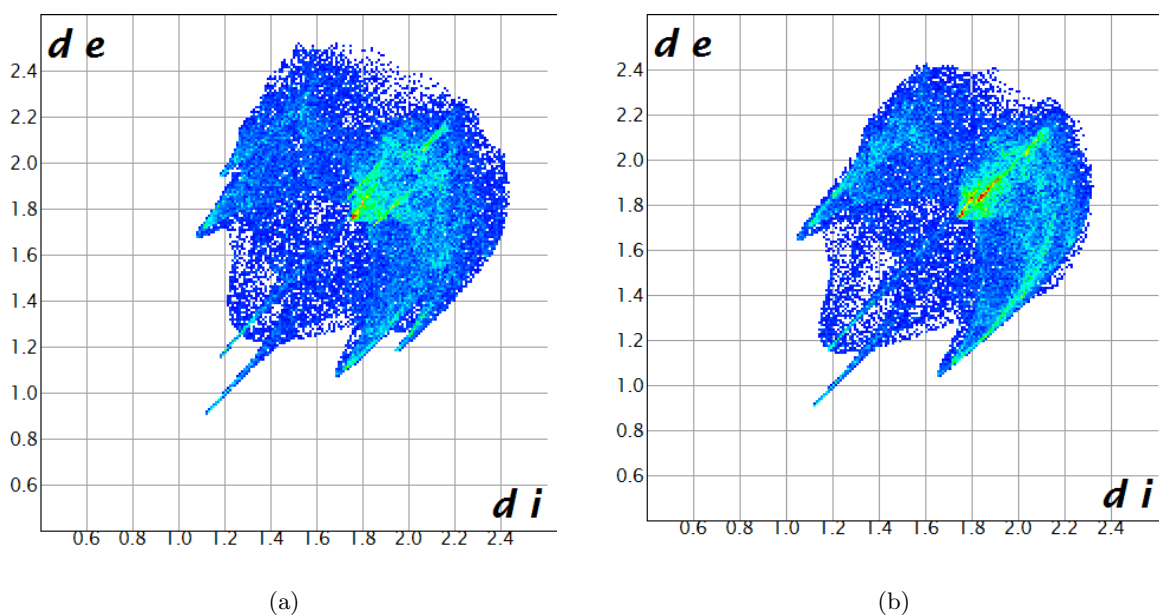

Figure 35: Hirshfeld fingerprint plots for (a) Cop16-Br and (b) cop16-Cl. The dissimilarity index of the two structures is  $x = 0.4$

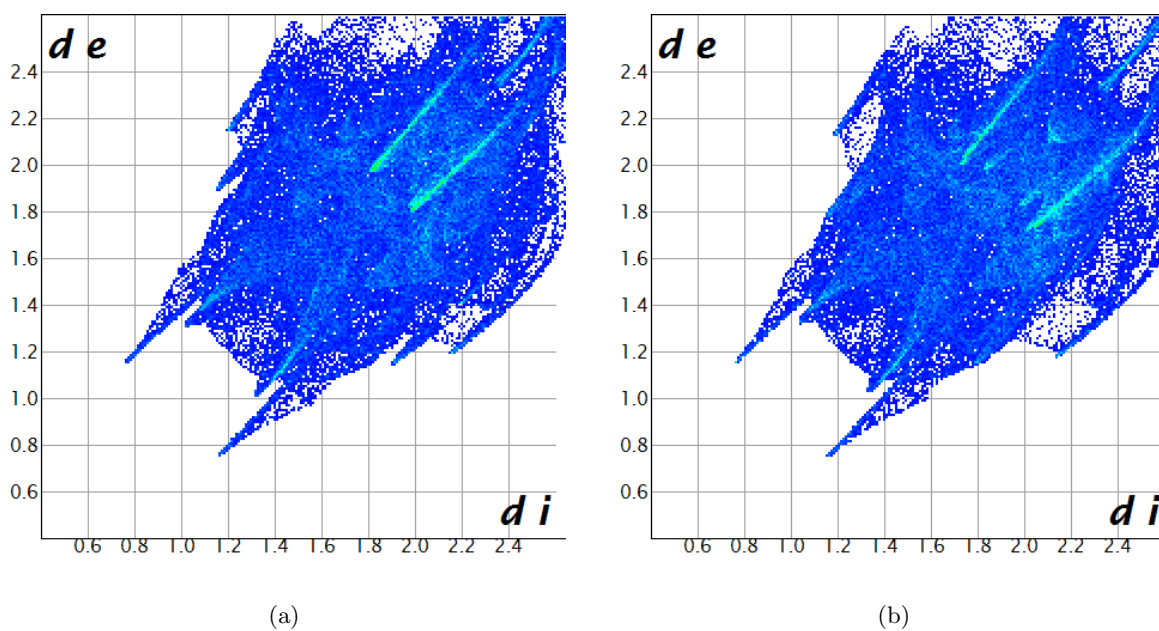

Figure 36: Hirshfeld fingerprint plots for (a) Cop17-Br and (b) cop17-Cl. The dissimilarity index of the two structures is  $x = 0.4$

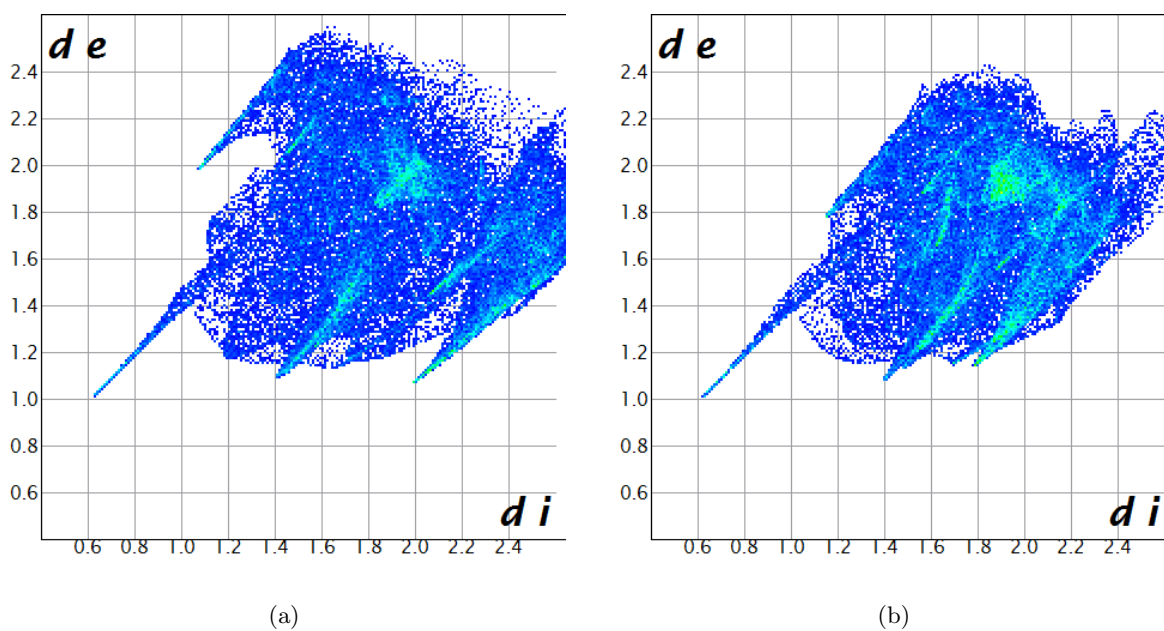

Figure 37: Hirshfeld fingerprint plots for (a) Cop18-I and (b) cop18-Cl. The dissimilarity index of the two structures is  $x = 7.4$

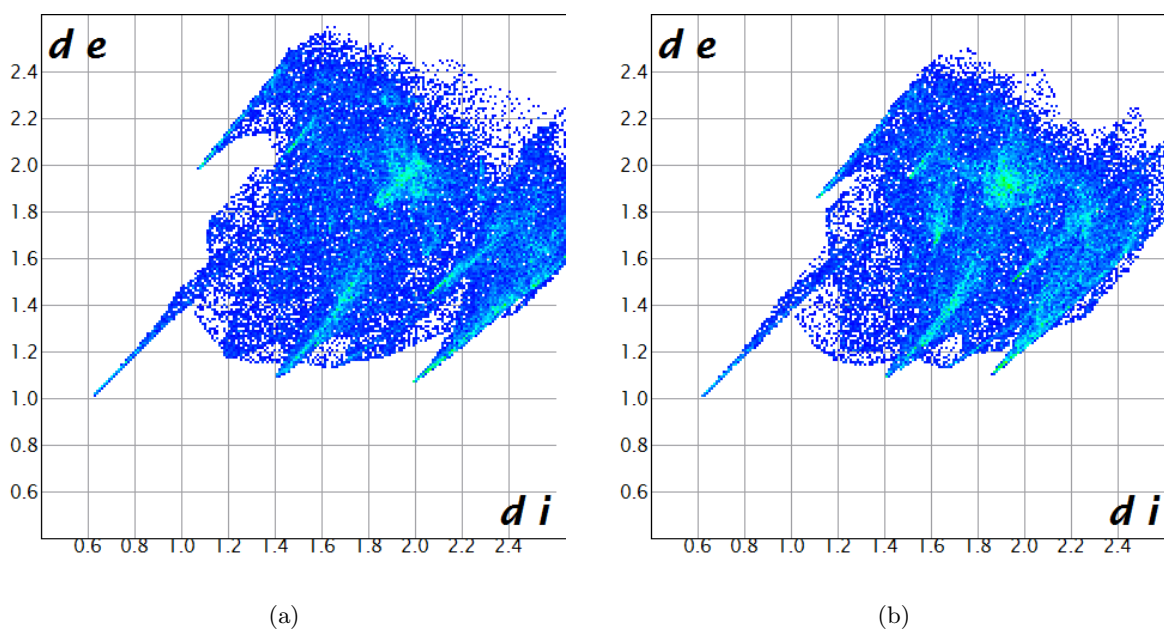

Figure 38: Hirshfeld fingerprint plots for (a) Cop19-I and (b) cop19-Br. The dissimilarity index of the two structures is  $x = 4.3$

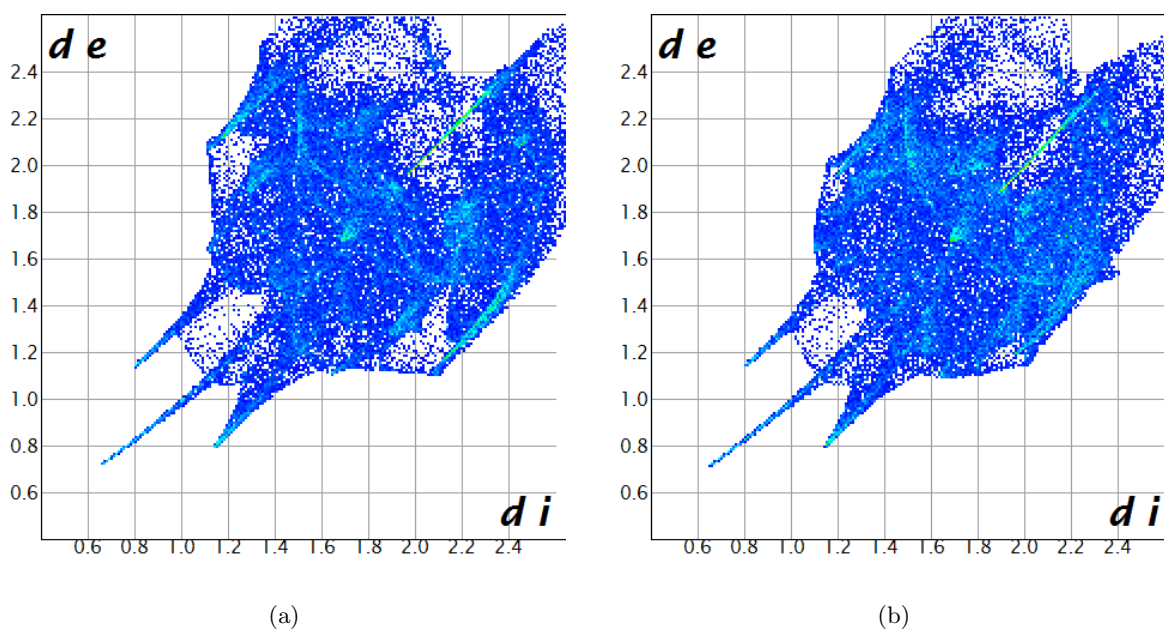

Figure 39: Hirshfeld fingerprint plots for (a) Cop20-I and (b) cop20-Br. The dissimilarity index of the two structures is  $x = 4.7$

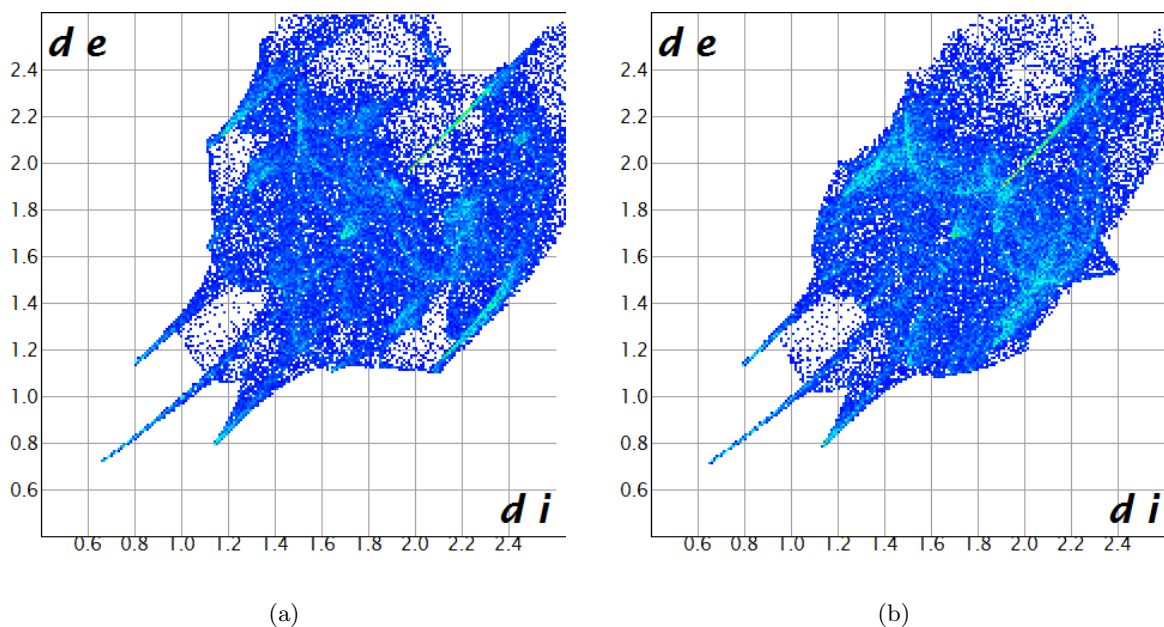

Figure 40: Hirshfeld fingerprint plots for (a) Cop21-I and (b) cop21-Cl. The dissimilarity index of the two structures is  $x = 4.8$

Table I: Geometric Parameters of  $\pi$ -involved interactions in couples

| Couple  | Interaction                                          | C-C Distance ( $\text{\AA}$ ) | P-P( $^\circ$ ) | P-CC ( $^\circ$ ) |
|---------|------------------------------------------------------|-------------------------------|-----------------|-------------------|
| cop4-I  | $\pi_{\text{Pyridine}} \cdots \pi_{\text{Pyridine}}$ | 4.15                          | 0.0             | 28.30, 28.30      |
| cop4-Cl | $\pi_{\text{Pyridine}} \cdots \pi_{\text{Pyridine}}$ | 3.91                          | 0.0             | 24.45, 24.47      |
| cop5-Br | $\pi_{\text{Pyridine}} \cdots \pi_{\text{Pyridine}}$ | 3.97                          | 0.0             | 23.68, 26.97      |
| cop5-Cl | $\pi_{\text{Pyridine}} \cdots \pi_{\text{Pyridine}}$ | 3.91                          | 0.0             | 24.45, 24.47      |

|          |                                     |      |      |              |
|----------|-------------------------------------|------|------|--------------|
| cop6-Br  | $\pi$ Pyridine $\cdots\pi$ Pyridine | 3.85 | 0.0  | 21.23, 21.49 |
| cop6-Cl  | $\pi$ Pyridine $\cdots\pi$ Pyridine | 3.81 | 0.0  | 20.79, 20.92 |
| cop7-Br  | $\pi$ Pyridine $\cdots\pi$ Pyridine | 3.94 | 0.0  | 20.45, 20.70 |
| cop7-Cl  | $\pi$ Pyridine $\cdots\pi$ Pyridine | 3.91 | 0.0  | 20.26, 19.66 |
| cop8-Br  | $\pi$ Pyridine $\cdots\pi$ Pyridine | 3.94 | 0.0  | 20.45, 20.70 |
| cop8-Cl  | $\pi$ Pyridine $\cdots\pi$ Pyridine | 3.81 | 0.0  | 20.79, 20.92 |
| cop9-Br  | $\pi$ Pyridine $\cdots\pi$ Pyridine | 3.85 | 0.0  | 21.23, 21.49 |
| cop9-Cl  | $\pi$ Pyridine $\cdots\pi$ Pyridine | 3.91 | 0.0  | 20.26, 19.66 |
| cop10-Br | $\pi$ Pyridine $\cdots\pi$ Pyridine | 4.14 | 0.0  | 19.02, 18.41 |
| cop10-Cl | $\pi$ Pyridine $\cdots\pi$ Pyridine | 4.13 | 0.0  | 17.94, 18.30 |
| cop11-Br | $\pi$ Pyridine $\cdots\pi$ Pyridine | 5.56 | 0.0  | 47.31, 46.91 |
| cop11-F  | $\pi$ Pyridine $\cdots\pi$ Pyridine | 6.01 | 0.0  | 49.36, 49.94 |
| cop12-I  | $\pi$ Pyridine $\cdots\pi$ Pyridine | 5.68 | 0.0  | 47.99, 47.97 |
| cop12-F  | $\pi$ Pyridine $\cdots\pi$ Pyridine | 6.01 | 0.0  | 49.36, 49.94 |
| cop13-I  | $\pi$ Pyridine $\cdots\pi$ Pyridine | 5.68 | 0.0  | 47.99, 47.97 |
| cop13-Cl | $\pi$ Pyridine $\cdots\pi$ Pyridine | 5.58 | 0.0  | 46.50, 47.19 |
| cop14-Br | $\pi$ Phenyl $\cdots\pi$ Pyrazine   | 3.95 | 7.31 | 27.15, 28.37 |
| cop14-Cl | $\pi$ Phenyl $\cdots\pi$ Pyrazine   | 3.94 | 6.11 | 26.05, 27.15 |
| cop16-Br | $\pi$ Pyridine $\cdots\pi$ Pyridine | 3.95 | 0.0  | 24.41, 24.80 |
| cop16-Cl | $\pi$ Pyridine $\cdots\pi$ Pyridine | 3.91 | 0.0  | 24.45, 24.47 |
| cop17-Br | $\pi$ Pyridine $\cdots\pi$ Pyridine | 5.56 | 0.0  | 47.31, 46.91 |
| cop17-Cl | $\pi$ Pyridine $\cdots\pi$ Pyridine | 5.58 | 0.0  | 46.50, 47.19 |
| cop18-I  | $\pi$ Acridine $\cdots\pi$ Acridine | 4.20 | 0.0  | 16.37, 16.55 |
| cop18-Cl | $\pi$ Acridine $\cdots\pi$ Acridine | 3.82 | 0.33 | 15.55, 15.55 |
| cop19-I  | $\pi$ Acridine $\cdots\pi$ Acridine | 4.20 | 0.0  | 16.37, 16.55 |
| cop19-Br | $\pi$ Acridine $\cdots\pi$ Acridine | 3.97 | 0.35 | 14.72, 14.72 |
| cop18-I  | $\pi$ Phenyl $\cdots\pi$ Phenyl     | 5.50 | 0.0  | 55.44, 55.44 |
| cop18-Cl | $\pi$ Phenyl $\cdots\pi$ Phenyl     | 5.25 | 0.0  | 50.50, 50.50 |
| cop19-I  | $\pi$ Phenyl $\cdots\pi$ Phenyl     | 5.50 | 0.0  | 55.44, 55.44 |
| cop19-Br | $\pi$ Phenyl $\cdots\pi$ Phenyl     | 5.32 | 0.00 | 52.75, 52.75 |
| cop20-I  | $\pi$ Phenyl $\cdots\pi$ Phenyl     | 4.57 | 0.0  | 47.39, 43.43 |
| cop20-Br | $\pi$ Phenyl $\cdots\pi$ Phenyl     | 4.56 | 0.0  | 43.62, 43.55 |
| cop21-I  | $\pi$ Phenyl $\cdots\pi$ Phenyl     | 4.57 | 0.0  | 47.39, 43.43 |
| cop21-Cl | $\pi$ Phenyl $\cdots\pi$ Phenyl     | 4.56 | 0.0  | 43.36, 43.34 |

Table II: Geometric Parameters of  $C - H \cdots \pi$  and  $C - X \cdots \pi$  interactions in couples

| Couple   | Interaction                                  | $d_{centroid}$ (Å) | $d_{plane}$ (Å) | $d_{offset}$ (Å) | $\alpha$ (°) | $\beta$ (°) |
|----------|----------------------------------------------|--------------------|-----------------|------------------|--------------|-------------|
| cop1-I   | $C - H_{Naphthalene} \cdots \pi Naphthalene$ | 2.83               | 2.69            | 0.88             | 74.03        | 127.50      |
| cop1-Br  | $C - H_{Naphthalene} \cdots \pi Naphthalene$ | 3.83               | 2.66            | 2.57             | 51.07        | 129.07      |
| cop2-I   | $C - H_{Naphthalene} \cdots \pi Naphthalene$ | 2.83               | 2.69            | 0.88             | 74.03        | 127.50      |
| cop2-Cl  | $C - H_{Naphthalene} \cdots \pi Naphthalene$ | 3.71               | 2.69            | 2.55             | 51.07        | 128.56      |
| cop3-I   | $C - H_{Naphthalene} \cdots \pi Naphthalene$ | 2.83               | 2.69            | 0.88             | 74.03        | 127.50      |
| cop3-F   | $C - H_{Naphthalene} \cdots \pi Naphthalene$ | 3.70               | 2.69            | 2.54             | 50.91        | 129.59      |
| cop1-I   | $C - H_{Naphthalene} \cdots \pi Phenyl$      | 3.42               | 2.72            | 2.07             | 52.68        | 131.85      |
| cop1-Br  | $C - H_{Naphthalene} \cdots \pi Phenyl$      | 2.76               | 2.70            | 0.57             | 87.29        | 138.63      |
| cop2-I   | $C - H_{Naphthalene} \cdots \pi Phenyl$      | 3.42               | 2.72            | 2.07             | 52.68        | 131.85      |
| cop2-Cl  | $C - H_{Naphthalene} \cdots \pi Phenyl$      | 2.72               | 2.67            | 0.57             | 87.26        | 138.66      |
| cop3-I   | $C - H_{Naphthalene} \cdots \pi Phenyl$      | 3.42               | 2.72            | 2.07             | 52.68        | 131.85      |
| cop3-F   | $C - H_{Naphthalene} \cdots \pi Phenyl$      | 2.71               | 2.67            | 0.46             | 79.89        | 138.68      |
| cop15-Br | $C - Br \cdots \pi Phenyl$                   | 3.68               | 3.61            | 0.71             | 80.25        | 152.24      |
| cop15-Cl | $C - Cl \cdots \pi Phenyl$                   | 3.37               | 3.33            | 0.52             | 82.30        | 147.26      |

## GEOMETRIC PARAMETERS OF COUPLES

Table III: Geometric Parameters and percent of halogen-involved interactions for cop4-21

| Couple   | Interaction | Distance(Å) | Contribution(%) | vdW radii changes (%) | $\Theta_1$ | $\Theta_2$ |
|----------|-------------|-------------|-----------------|-----------------------|------------|------------|
| cop4-I   | I...Cl      | 3.38        | 3.9             | -9.38                 | 169        | 121        |
| cop4-Cl  | Cl...Cl     | 3.59        | 4.3             | +2.57                 | 159        | 121        |
| cop5-Br  | Br...Cl     | 3.43        | 3.2             | -4.72                 | 166        | 126        |
| cop5-Cl  | Cl...Cl     | 3.59        | 4.3             | +2.57                 | 159        | 121        |
| cop6-Br  | Br...Cl     | 3.57        | 2.4             | -0.83                 | 164        | 111        |
| cop6-Cl  | Cl...Cl     | 3.61        | 4.4             | +3.14                 | 164        | 111        |
| cop7-Br  | Br...Br     | 3.62        | 5.0             | -2.16                 | 166        | 110        |
| cop7-Cl  | Br...Cl     | 3.65        | 2.2             | +4.28                 | 167        | 110        |
| cop8-Br  | Br...Br     | 3.62        | 5.0             | -2.16                 | 166        | 110        |
| cop8-Cl  | Cl...Cl     | 3.61        | 4.4             | +3.14                 | 164        | 111        |
| cop9-Br  | Br...Cl     | 3.57        | 2.4             | -0.83                 | 164        | 111        |
| cop9-Cl  | Br...Cl     | 3.65        | 2.2             | +4.28                 | 167        | 110        |
| cop10-Br | I...Br      | 3.75        | 2.7             | -2.09                 | 169        | 109        |
| cop10-Cl | I...Cl      | 3.80        | 2.6             | +1.88                 | 171        | 109        |
| cop11-Br | Br...I      | 3.74        | 7.5             | -2.35                 | 80         | 172        |
| cop11-F  | F...I       | 3.51        | 3.8             | +1.74                 | 69         | 159        |
| cop12-I  | I...I       | 3.87        | 8.8             | -2.28                 | 83         | 175        |
| cop12-F  | F...I       | 3.51        | 3.8             | +1.74                 | 69         | 159        |
| cop13-I  | I...I       | 3.87        | 8.8             | -2.28                 | 83         | 175        |
| cop13-Cl | I...Cl      | 3.73        | 6.5             | +0.01                 | 78         | 169        |
| cop14-Br | Br...Br     | 3.58        | 0.3             | -3.24                 | 90         | 156        |
| cop14-Cl | Cl...Cl     | 3.52        | 0.1             | +0.57                 | 92         | 156        |
| cop15-Br | Br...O      | 3.26        | 6.0             | -3.26                 | 91         | 118        |
| cop15-Cl | Cl...O      | 3.44        | 4.2             | +5.20                 | 91         | 130        |
| cop16-Br | Br...Cl     | 3.53        | 2.4             | -1.94                 | 158        | 121        |
| cop16-Cl | Cl...Cl     | 3.59        | 4.3             | +2.57                 | 159        | 121        |
| cop17-Br | Br...I      | 3.74        | 7.5             | -2.35                 | 80         | 172        |
| cop17-Cl | Cl...I      | 3.73        | 6.5             | +0.01                 | 78         | 169        |
| cop18-I  | I...O       | 3.46        | 3.3             | -1.14                 | 157        | 147        |
| cop18-Cl | Cl...O      | 3.39        | 3.6             | +3.67                 | 154        | 141        |
| cop19-I  | I...O       | 3.46        | 3.3             | -1.14                 | 157        | 147        |
| cop19-Br | Br...O      | 3.41        | 4.1             | +1.19                 | 156        | 145        |
| cop20-I  | I...I       | 3.88        | 3.4             | -2.02                 | 140        | 140        |
| cop20-Br | Br...Br     | 3.74        | 3.2             | +1.08                 | 138        | 138        |
| cop21-I  | I...I       | 3.88        | 3.4             | -2.02                 | 140        | 140        |
| cop21-Cl | Cl...Cl     | 3.75        | 3.0             | +7.14                 | 136        | 136        |

## RELAXED HIRSHFELD FINGERPRINTS

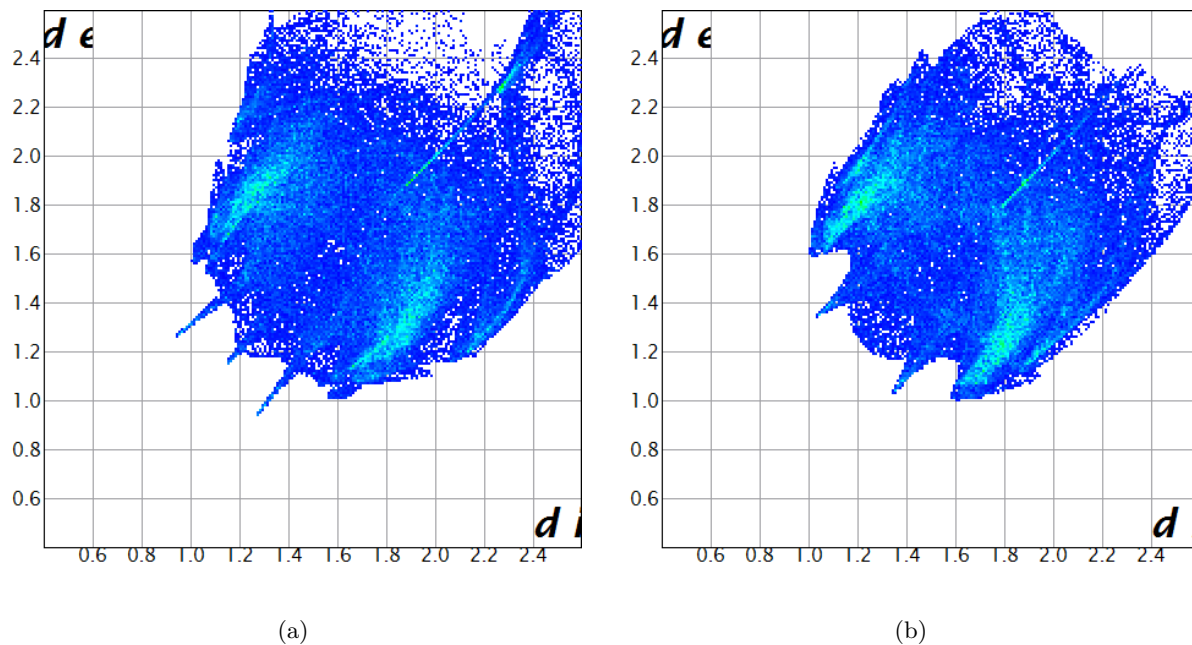

Figure 41: Hirshfeld fingerprint plots of relaxed structures for (a) Cop1-I-relaxed and (b) cop1-Br-relaxed

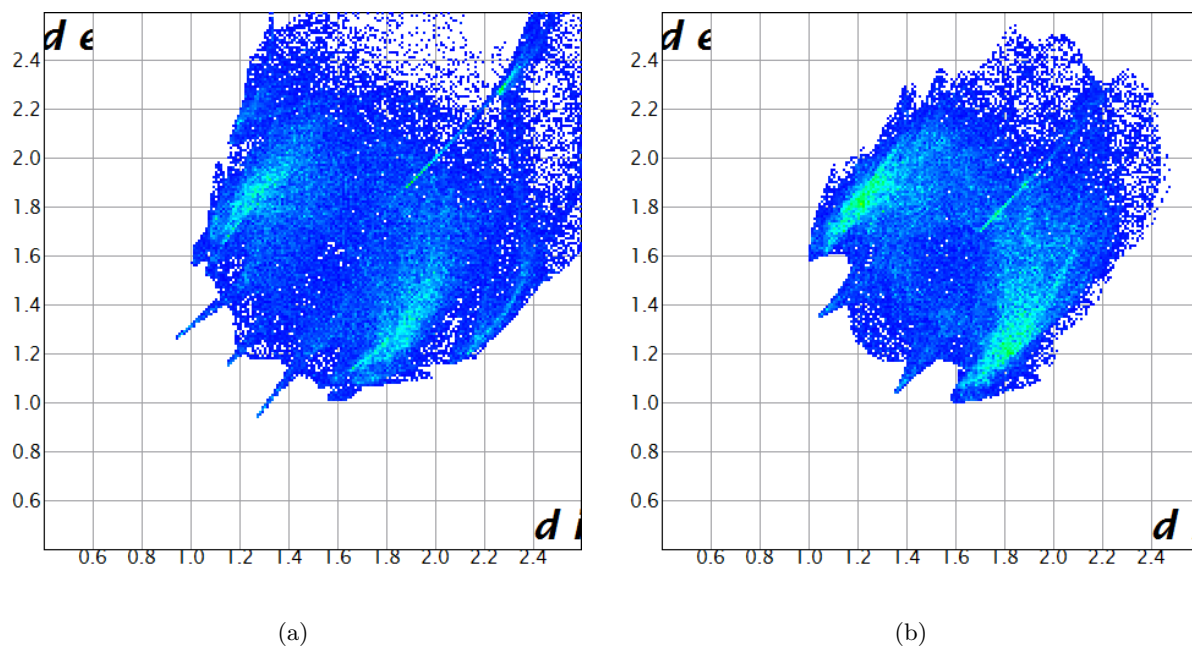

Figure 42: Hirshfeld fingerprint plots of relaxed structures for (a) Cop2-I-relaxed and (b) cop2-Cl-relaxed

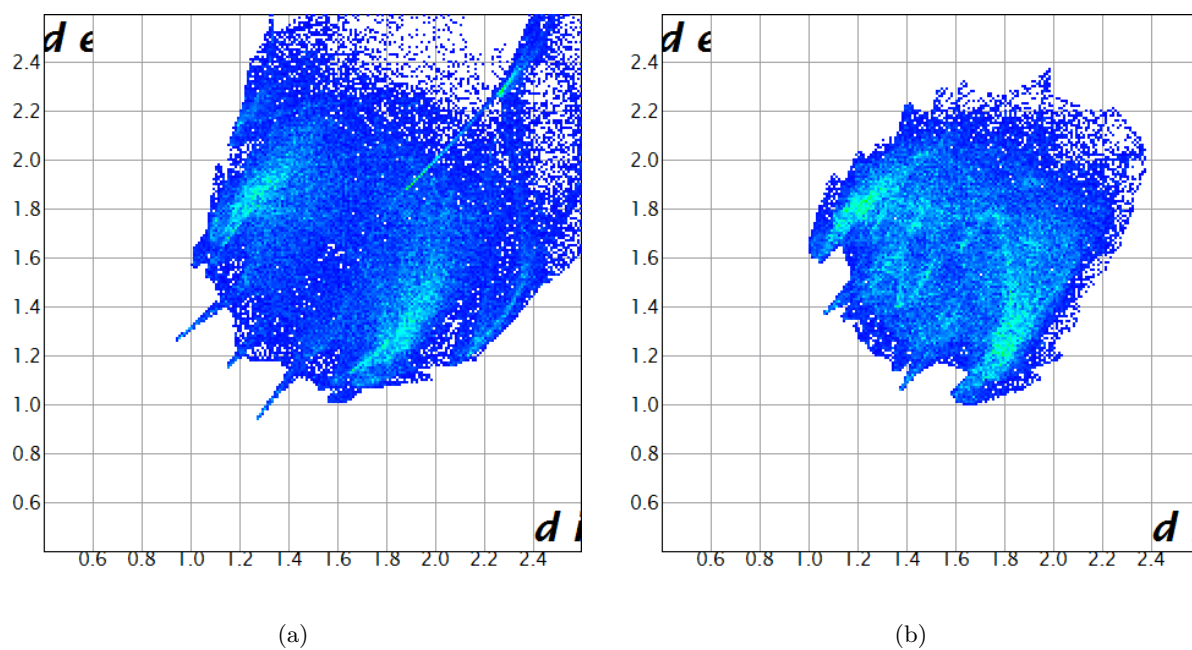

Figure 43: Hirshfeld fingerprint plots of relaxed structures for (a) Cop3-I-relaxed and (b) cop3-F-relaxed

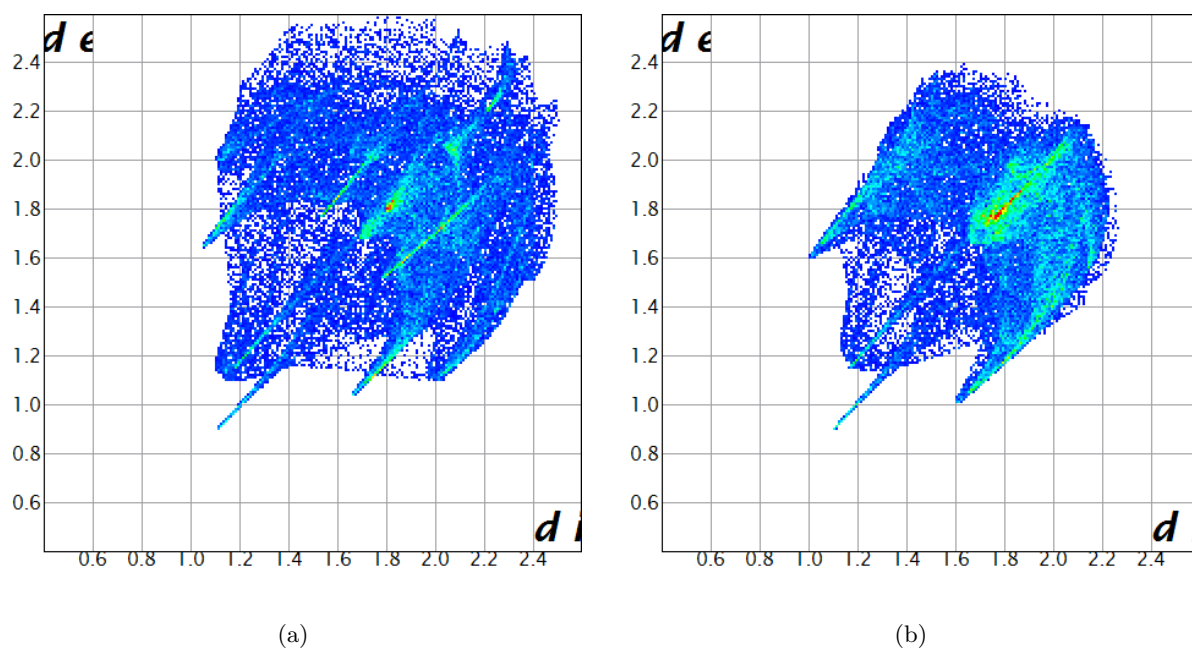

Figure 44: Hirshfeld fingerprint plots of relaxed structures for (a) Cop4-I-relaxed and (b) cop4-Cl-relaxed

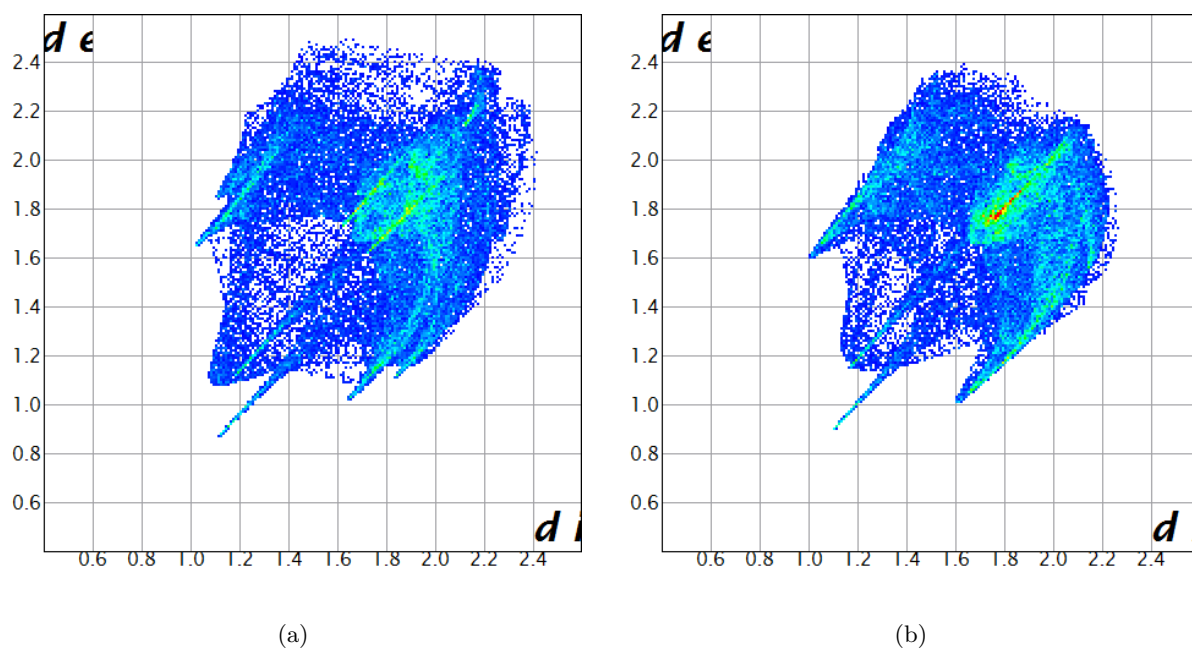

Figure 45: Hirshfeld fingerprint plots of relaxed structures for (a) Cop5-Br-relaxed and (b) cop5-Cl-relaxed

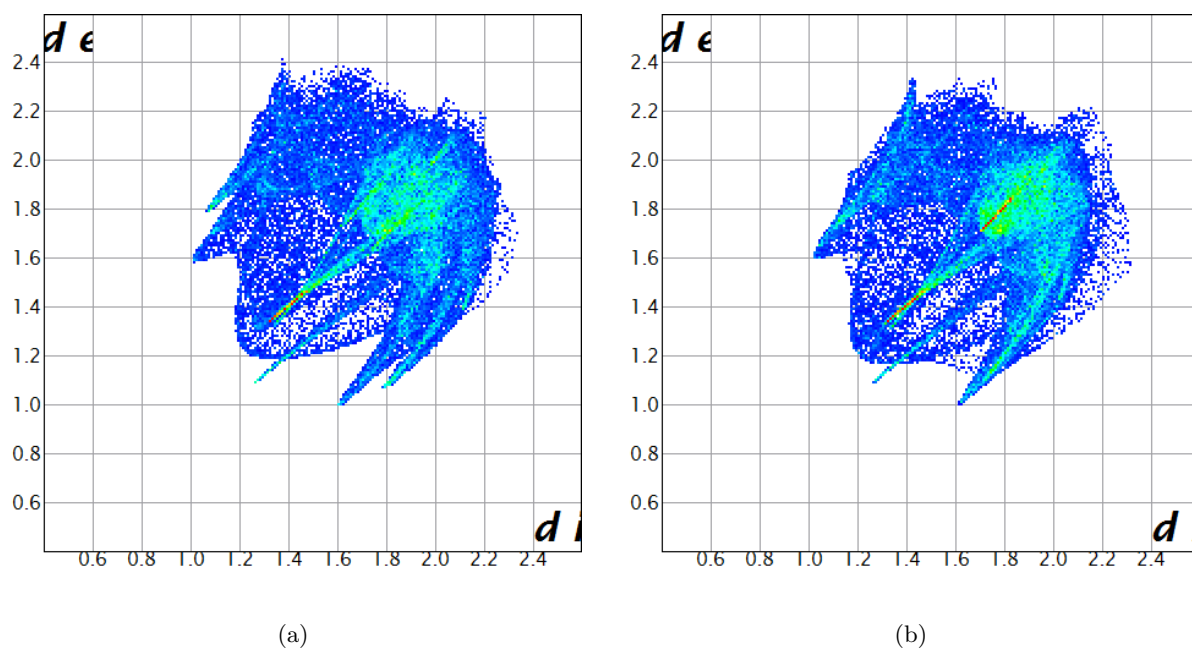

Figure 46: Hirshfeld fingerprint plots of relaxed structures for (a) Cop6-Br-relaxed and (b) cop6-Cl-relaxed



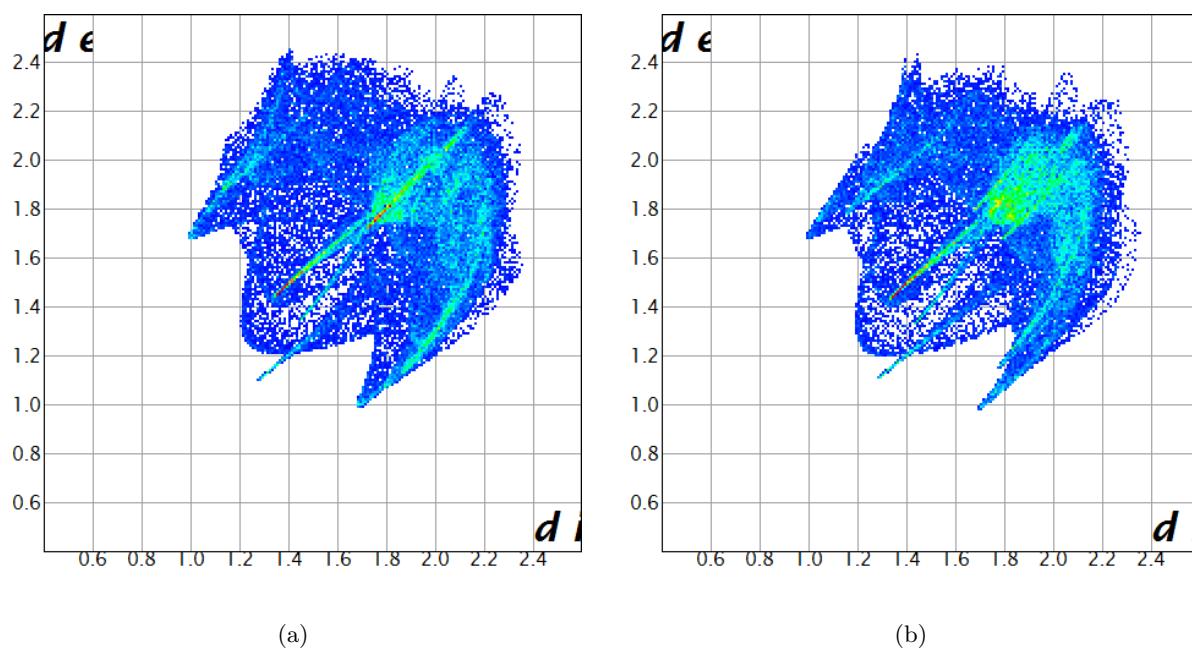

Figure 47: Hirshfeld fingerprint plots of relaxed structures for (a) Cop7-Br-relaxed and (b) cop7-Cl-relaxed

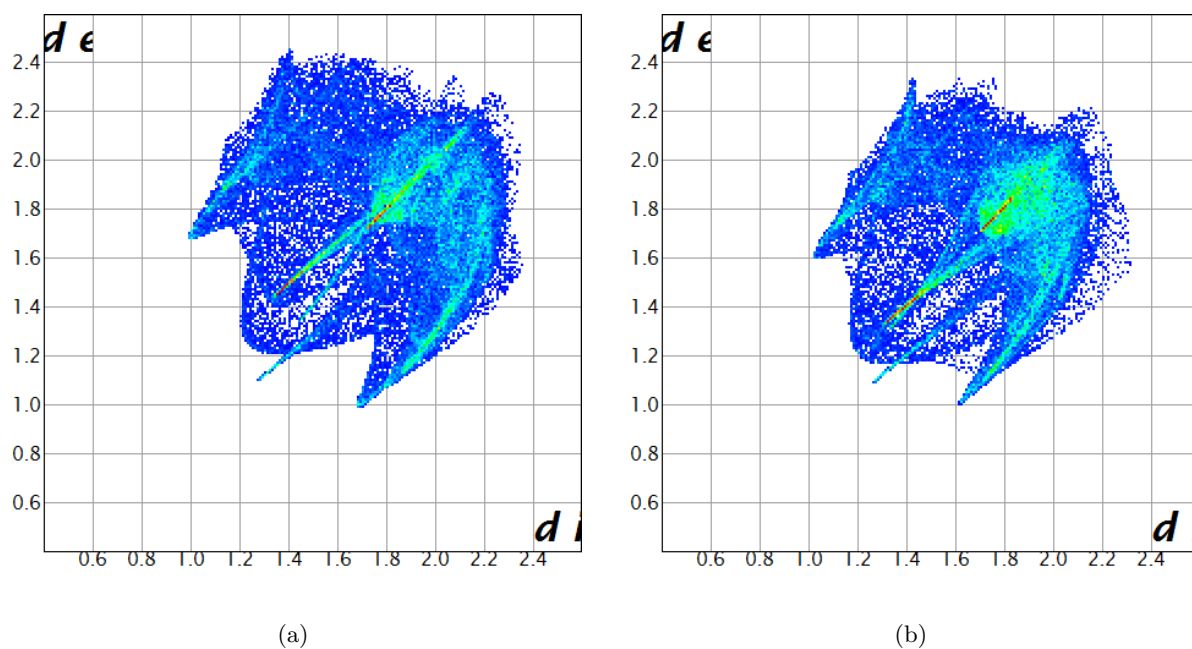

Figure 48: Hirshfeld fingerprint plots of relaxed structures for (a) Cop8-Br-relaxed and (b) cop8-Cl-relaxed

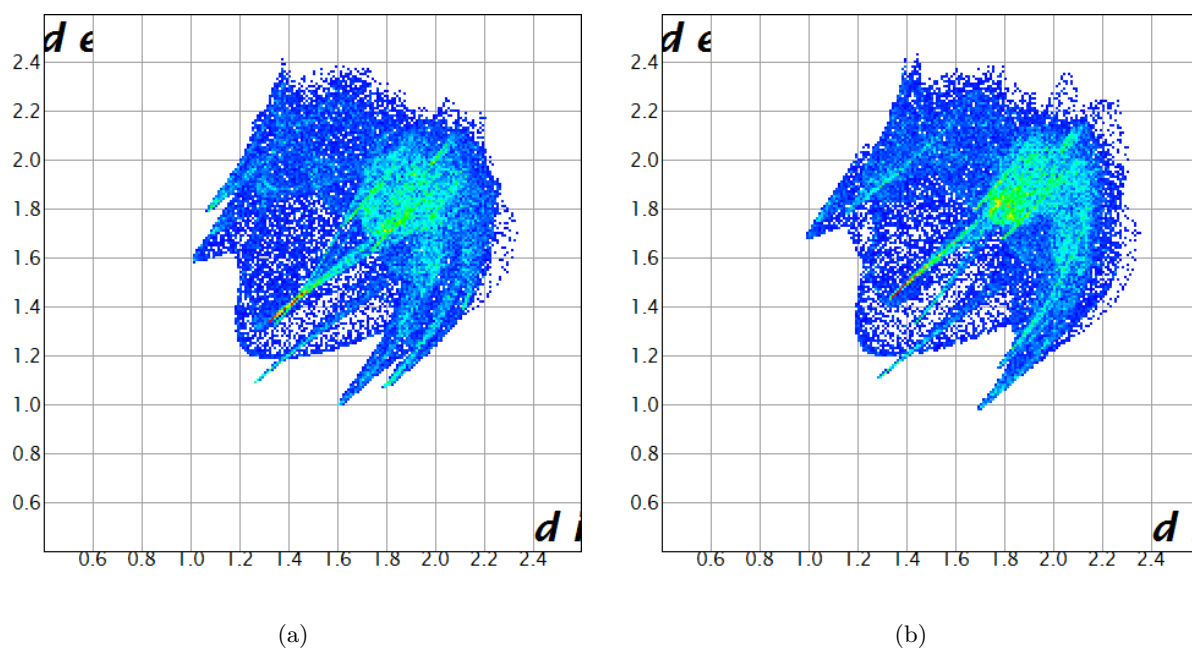

Figure 49: Hirshfeld fingerprint plots of relaxed structures for (a) Cop9-Br-relaxed and (b) cop9-Cl-relaxed

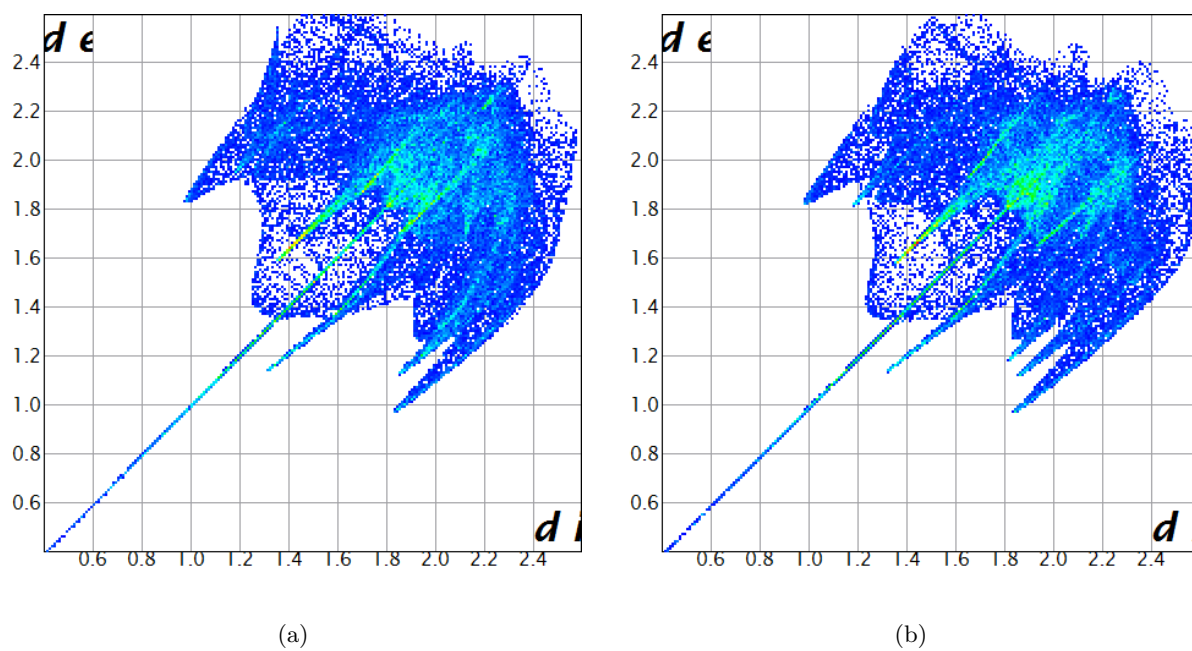

Figure 50: Hirshfeld fingerprint plots of relaxed structures for (a) Cop10-Br-relaxed and (b) cop10-Cl-relaxed

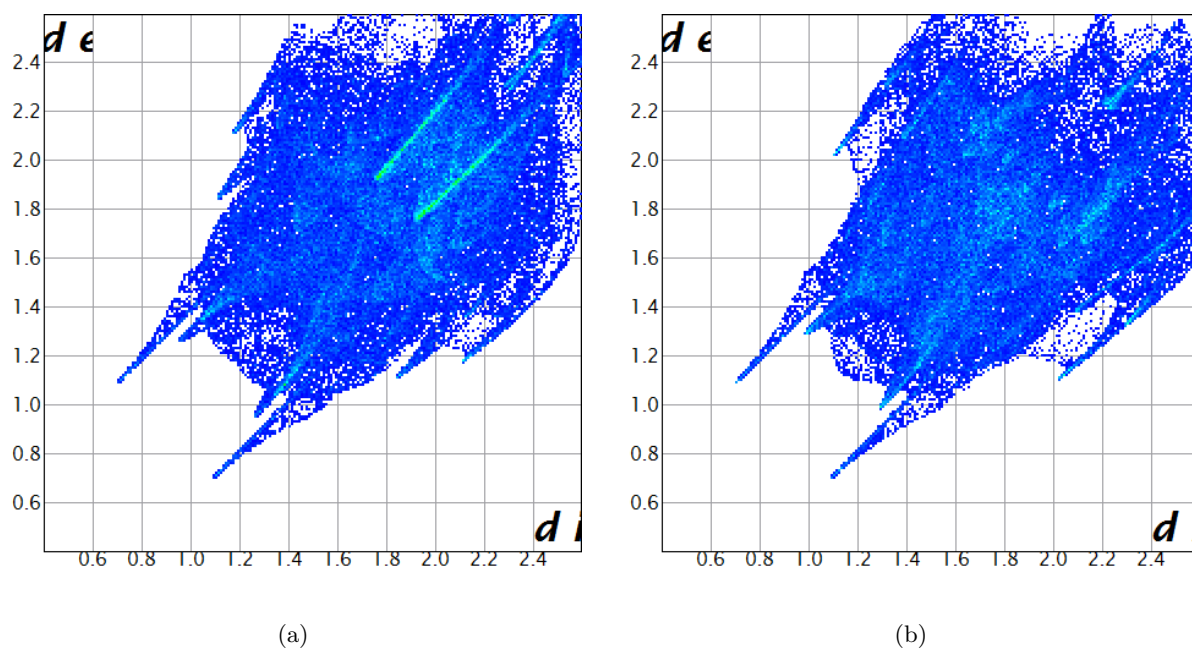

Figure 51: Hirshfeld fingerprint plots of relaxed structures for (a) Cop11-Br-relaxed and (b) cop11-F-relaxed

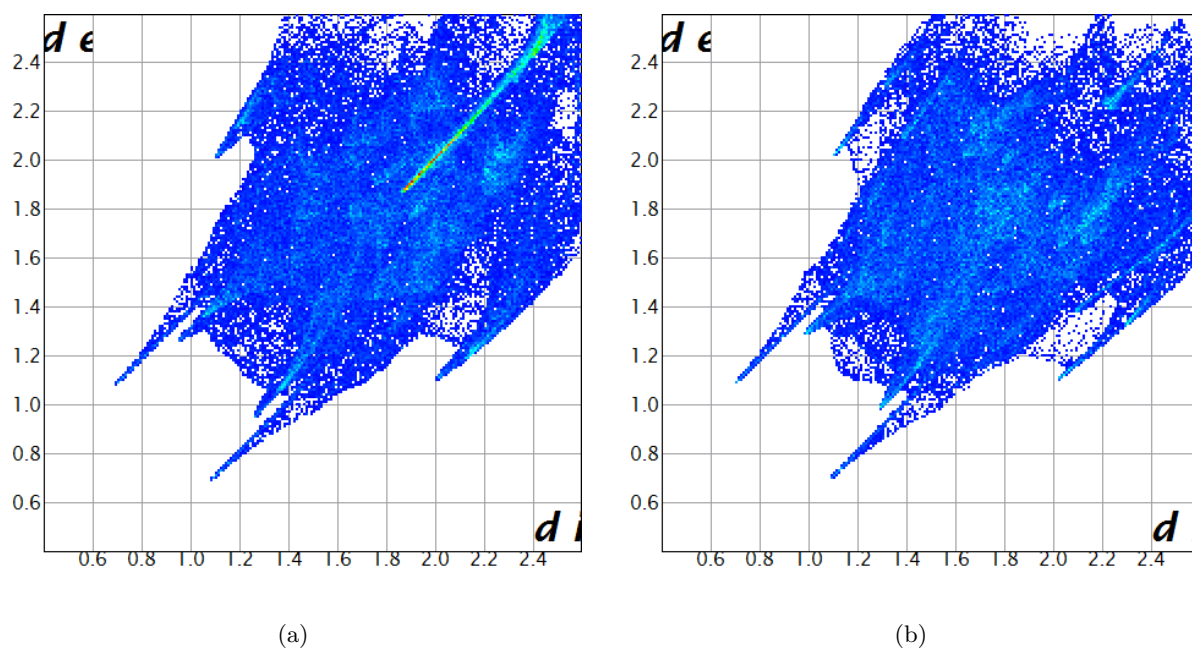

Figure 52: Hirshfeld fingerprint plots of relaxed structures for (a) Cop12-I-relaxed and (b) cop12-F-relaxed

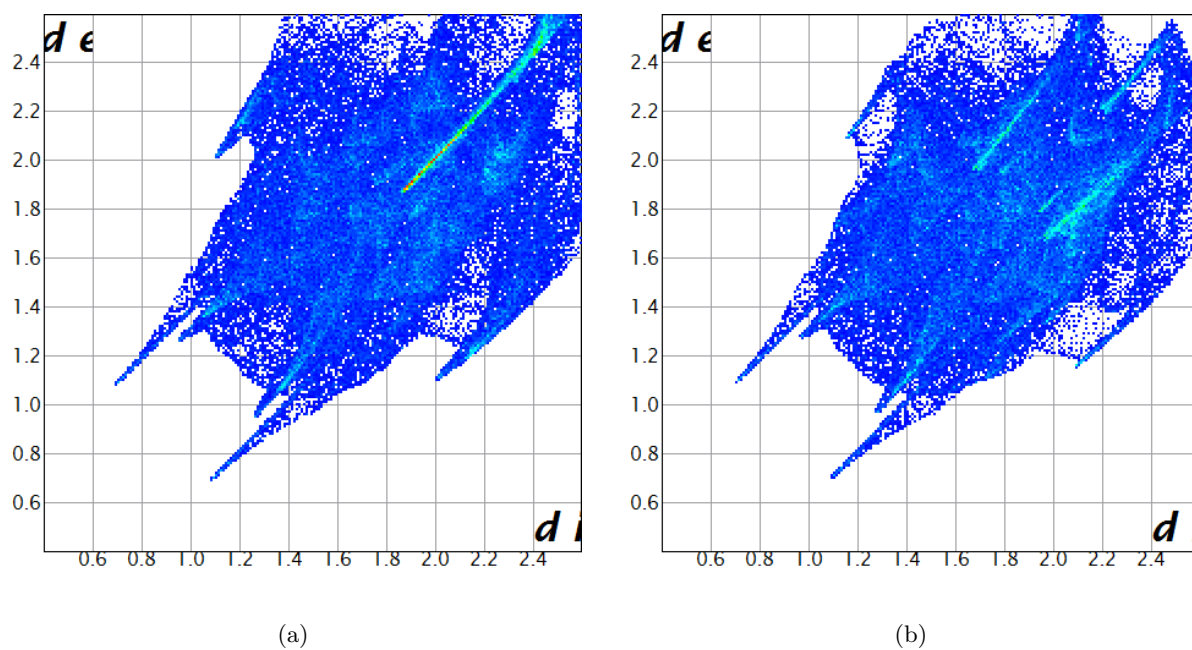

Figure 53: Hirshfeld fingerprint plots of relaxed structures for (a) Cop13-I-relaxed and (b) cop13-Cl-relaxed

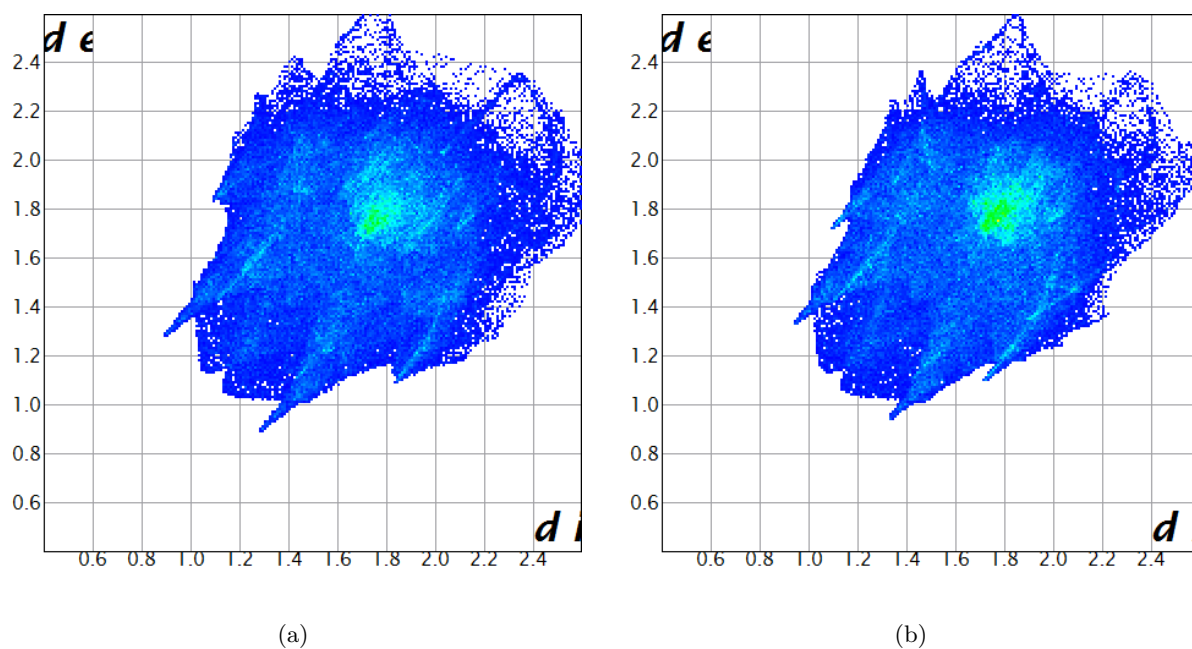

Figure 54: Hirshfeld fingerprint plots of relaxed structures for (a) Cop14-Br-relaxed and (b) cop14-Cl-relaxed

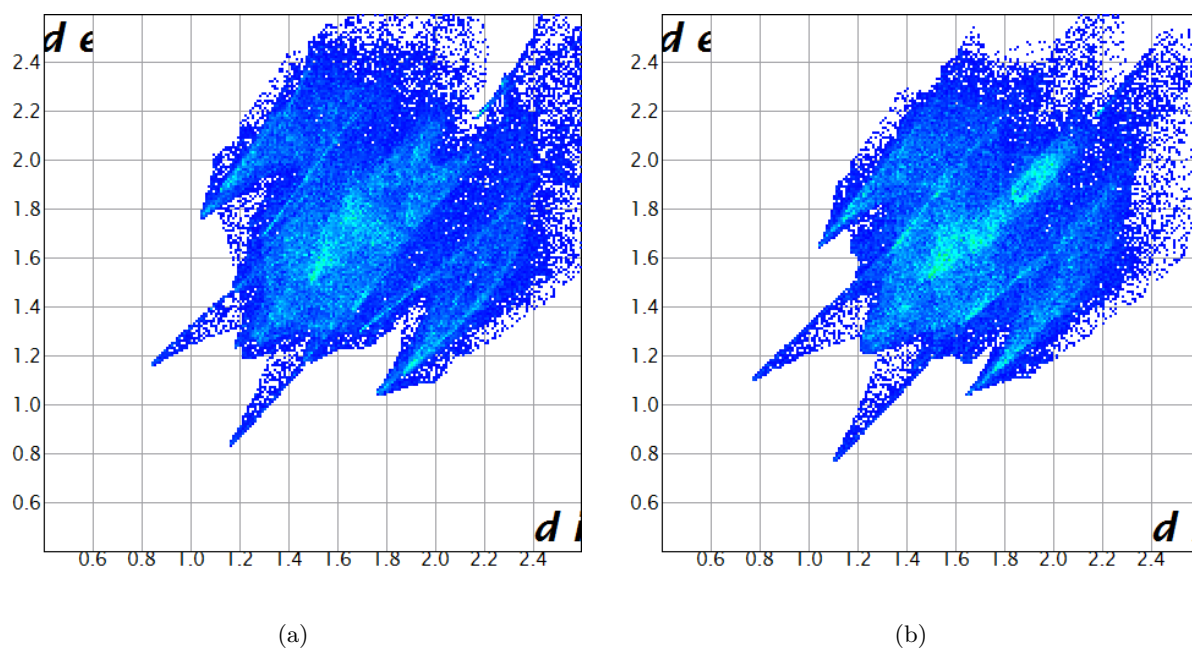

Figure 55: Hirshfeld fingerprint plots of relaxed structures for (a) Cop15-Br-relaxed and (b) cop15-Cl-relaxed

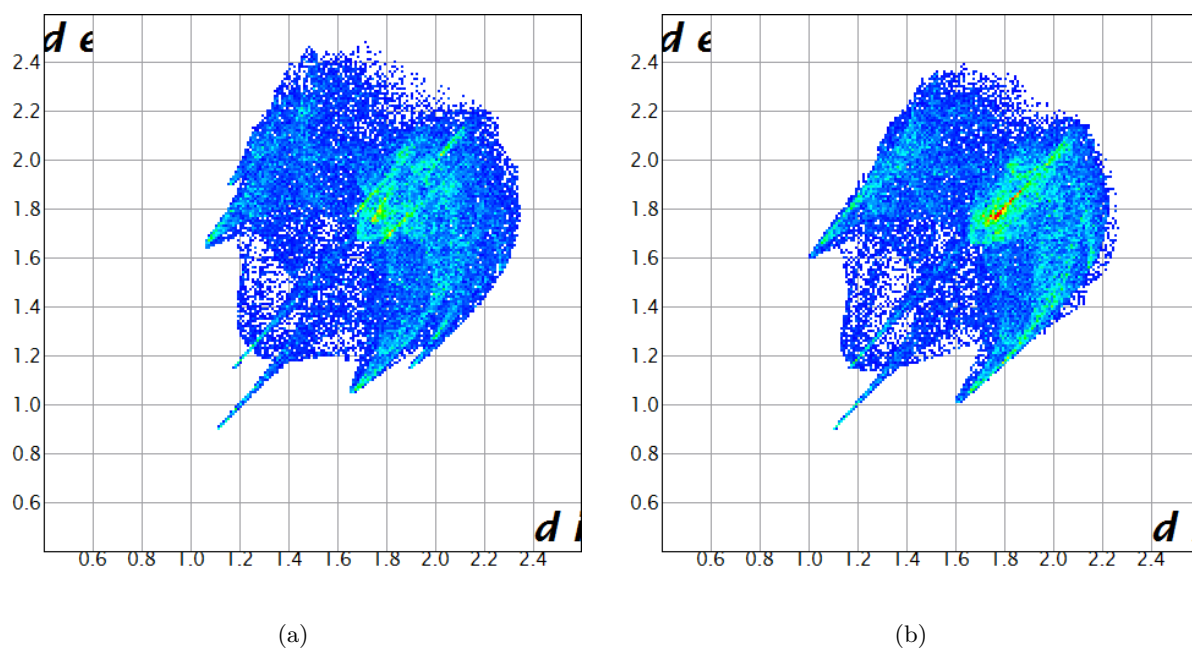

Figure 56: Hirshfeld fingerprint plots of relaxed structures for (a) Cop16-Br-relaxed and (b) cop16-Cl-relaxed

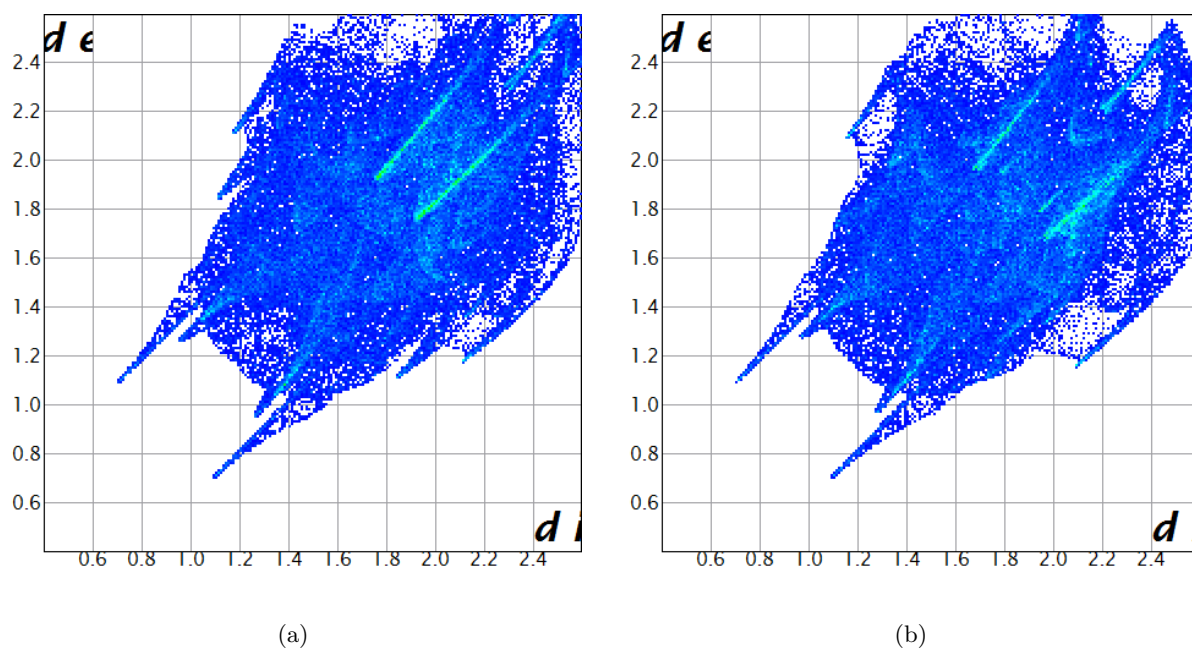

Figure 57: Hirshfeld fingerprint plots of relaxed structures for (a) Cop17-Br-relaxed and (b) cop17-Cl-relaxed

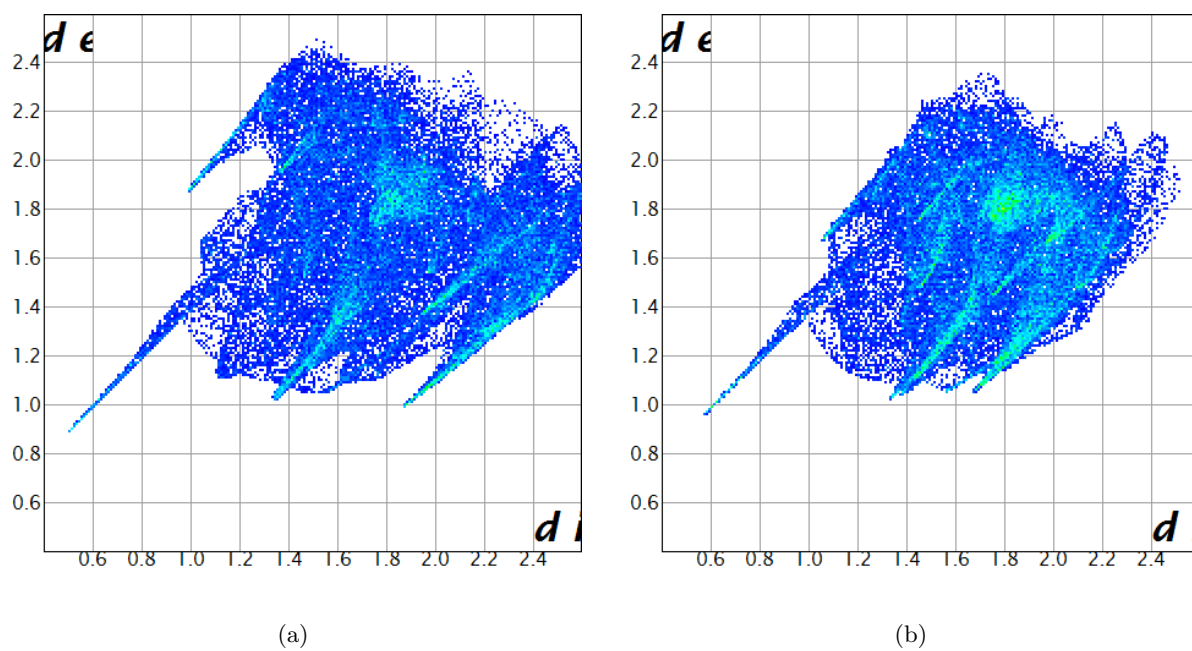

Figure 58: Hirshfeld fingerprint plots of relaxed structures for (a) Cop18-I-relaxed and (b) cop18-Cl-relaxed

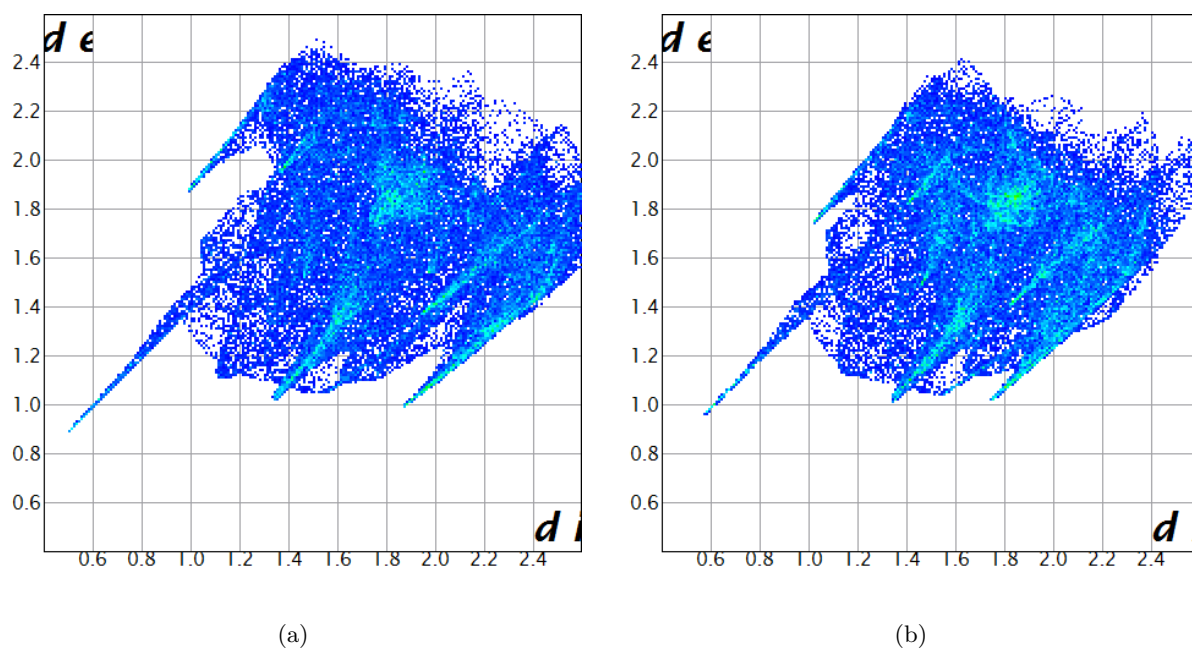

Figure 59: Hirshfeld fingerprint plots of relaxed structures for (a) Cop19-I-relaxed and (b) cop19-Br-relaxed

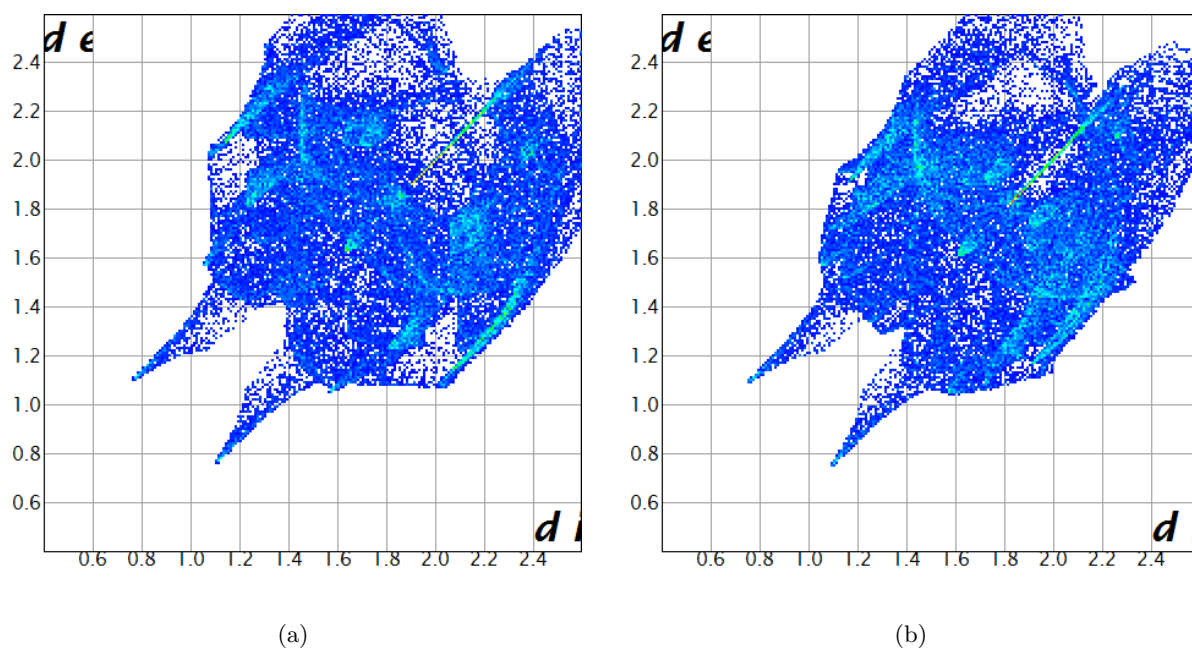

Figure 60: Hirshfeld fingerprint plots of relaxed structures for (a) Cop20-I-relaxed and (b) cop20-Br-relaxed

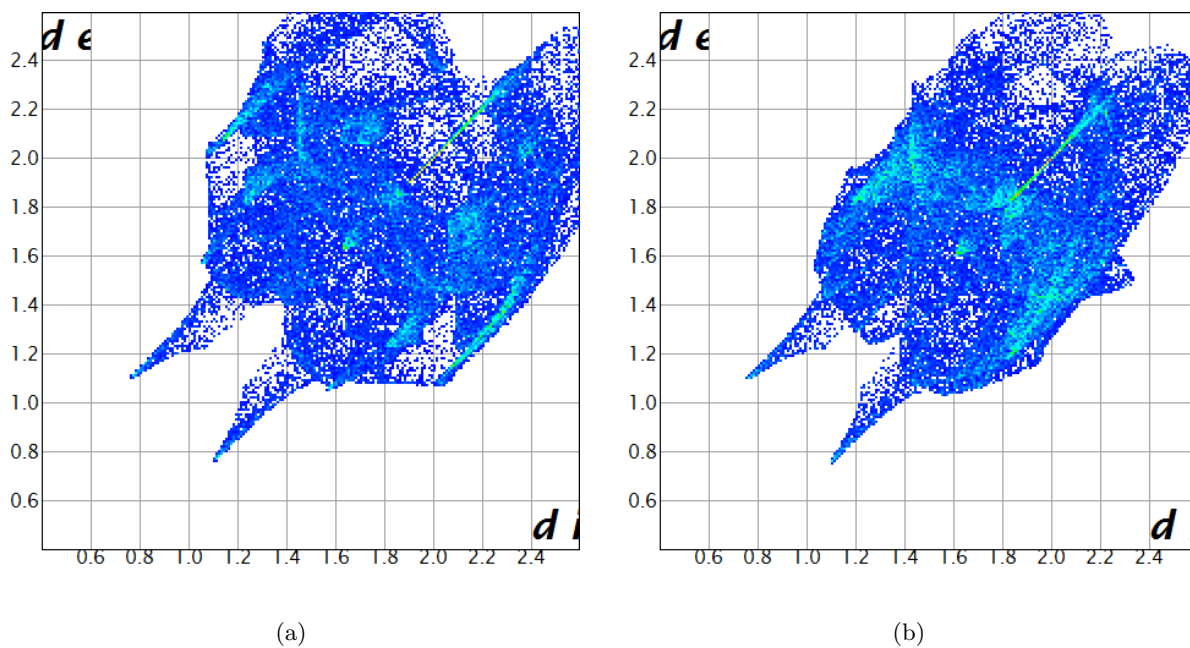

Figure 61: Hirshfeld fingerprint plots of relaxed structures for (a) Cop21-I-relaxed and (b) cop21-Cl-relaxed

Table IV: Geometric Parameters and percent of halogen-involved interactions for experimental and relaxed structures of cop1-cop21

| Couple          | $R_1 - X_1$ (Å) | $R_2 - X_2$ (Å) | Interaction Distance (Å) | Hirshfeld(%) | $\Theta_1$ | $\Theta_2$ |
|-----------------|-----------------|-----------------|--------------------------|--------------|------------|------------|
| cop1-I          | 2.09            | 2.09            | 3.91                     | 2.7          | 140        | 140        |
| cop1-I-relaxed  | 2.11            | 2.11            | 3.75                     | 3.3          | 141        | 141        |
| cop1-Br         | 1.90            | 1.90            | 3.77                     | 1.3          | 129        | 129        |
| cop1-Br-relaxed | 1.91            | 1.91            | 3.60                     | 1.3          | 129        | 129        |
| cop2-I          | 2.09            | 2.09            | 3.91                     | 2.7          | 140        | 140        |
| cop2-I-relaxed  | 2.11            | 2.11            | 3.75                     | 3.3          | 141        | 141        |
| cop2-Cl         | 1.75            | 1.75            | 3.61                     | 1.2          | 129        | 129        |
| cop2-Cl-relaxed | 1.75            | 1.75            | 3.42                     | 1.3          | 130        | 130        |
| cop3-I          | 2.09            | 2.09            | 3.91                     | 2.7          | 140        | 140        |
| cop3-I-relaxed  | 2.11            | 2.11            | 3.75                     | 3.3          | 141        | 141        |
| cop3-F          | 1.36            | 1.36            | 3.55                     | 0.7          | 127        | 127        |
| cop3-F-relaxed  | 1.37            | 1.37            | 3.27                     | 0.8          | 129        | 129        |
| cop4-I          | 2.32            | 2.09            | 3.38                     | 3.9          | 169        | 121        |
| cop4-I-relaxed  | 2.34            | 2.10            | 3.32                     | 4.2          | 170        | 119        |
| cop4-Cl         | 2.31            | 1.74            | 3.59                     | 4.3          | 159        | 121        |
| cop4-Cl-relaxed | 2.33            | 1.73            | 3.53                     | 4.5          | 161        | 121        |
| cop5-Br         | 2.31            | 1.89            | 3.43                     | 3.2          | 166        | 126        |
| cop5-Br-relaxed | 2.33            | 1.91            | 3.37                     | 3.3          | 168        | 125        |
| cop5-Cl         | 2.31            | 1.74            | 3.59                     | 4.3          | 159        | 121        |
| cop5-Cl-relaxed | 2.33            | 1.73            | 3.53                     | 4.5          | 161        | 121        |
| cop6-Br         | 2.66            | 1.89            | 3.57                     | 2.4          | 164        | 111        |
| cop6-Br-relaxed | 2.68            | 1.91            | 3.39                     | 2.7          | 166        | 103        |
| cop6-Cl         | 2.64            | 1.74            | 3.61                     | 4.4          | 164        | 111        |
| cop6-Cl-relaxed | 2.67            | 1.73            | 3.43                     | 4.3          | 165        | 109        |
| cop7-Br         | 2.76            | 1.89            | 3.62                     | 5.0          | 166        | 110        |
| cop7-Br-relaxed | 2.80            | 1.90            | 3.46                     | 4.9          | 167        | 106        |
| cop7-Cl         | 2.75            | 1.73            | 3.65                     | 2.2          | 167        | 110        |
| cop7-Cl-relaxed | 2.79            | 1.74            | 3.48                     | 2.6          | 167        | 107        |
| cop8-Br         | 2.76            | 1.89            | 3.62                     | 5.0          | 166        | 110        |
| cop8-Br-relaxed | 2.80            | 1.90            | 3.46                     | 4.9          | 167        | 106        |
| cop8-Cl         | 2.64            | 1.74            | 3.61                     | 4.4          | 164        | 111        |



|                  |      |      |      |      |     |     |
|------------------|------|------|------|------|-----|-----|
| cop8-Cl-relaxed  | 2.67 | 1.73 | 3.43 | 4.3  | 165 | 109 |
| cop9-Br          | 2.66 | 1.89 | 3.57 | 2.4  | 164 | 111 |
| cop9-Br-relaxed  | 2.68 | 1.91 | 3.39 | 2.7  | 166 | 103 |
| cop9-Cl          | 2.75 | 1.73 | 3.65 | 2.2  | 167 | 110 |
| cop9-Cl-relaxed  | 2.79 | 1.74 | 3.48 | 2.6  | 167 | 107 |
| cop10-Br         | 2.92 | 1.88 | 3.75 | 2.7  | 169 | 109 |
| cop10-Br-relaxed | 3.02 | 1.91 | 3.56 | 3.4  | 170 | 101 |
| cop10-Cl         | 2.91 | 1.73 | 3.80 | 2.6  | 171 | 109 |
| cop10-Cl-relaxed | 3.01 | 1.74 | 3.58 | 3.4  | 172 | 101 |
| cop11-Br         | 2.09 | 1.91 | 3.74 | 7.5  | 80  | 172 |
| cop11-Br-relaxed | 2.10 | 1.92 | 3.69 | 8.6  | 81  | 173 |
| cop11-F          | 2.09 | 1.36 | 3.51 | 3.8  | 69  | 159 |
| cop11-F-relaxed  | 2.10 | 1.37 | 3.48 | 5.1  | 69  | 158 |
| cop12-I          | 2.07 | 2.10 | 3.87 | 8.8  | 83  | 175 |
| cop12-I-relaxed  | 2.10 | 2.12 | 3.74 | 11.1 | 81  | 177 |
| cop12-F          | 2.09 | 1.36 | 3.51 | 3.8  | 69  | 159 |
| cop12-F-relaxed  | 2.10 | 1.37 | 3.48 | 5.1  | 69  | 158 |
| cop13-I          | 2.07 | 2.10 | 3.87 | 8.8  | 83  | 175 |
| cop13-I-relaxed  | 2.10 | 2.12 | 3.74 | 11.1 | 81  | 177 |
| cop13-Cl         | 2.09 | 1.74 | 3.73 | 6.5  | 78  | 169 |
| cop13-Cl-relaxed | 2.10 | 1.75 | 3.64 | 7.4  | 76  | 171 |
| cop14-Br         | 1.90 | 1.90 | 3.58 | 0.3  | 90  | 156 |
| cop14-Br-relaxed | 1.92 | 1.92 | 3.49 | 0.3  | 89  | 157 |
| cop14-Cl         | 1.78 | 1.78 | 3.52 | 0.1  | 92  | 156 |
| cop14-Cl-relaxed | 1.75 | 1.75 | 3.41 | 0.1  | 91  | 157 |
| cop15-Br         | 1.17 | 1.90 | 3.26 | 6.0  | 91  | 118 |
| cop15-Br-relaxed | 1.24 | 1.97 | 3.40 | 5.2  | 85  | 112 |
| cop15-Cl         | 1.21 | 1.77 | 3.44 | 4.2  | 91  | 130 |
| cop15-Cl-relaxed | 1.24 | 1.80 | 3.39 | 4.2  | 91  | 119 |
| cop16-Br         | 2.32 | 1.89 | 3.53 | 2.4  | 158 | 121 |
| cop16-Br-relaxed | 2.34 | 1.90 | 3.45 | 2.4  | 160 | 121 |
| cop16-Cl         | 2.31 | 1.74 | 3.59 | 4.3  | 159 | 121 |
| cop16-Cl-relaxed | 2.33 | 1.73 | 3.53 | 4.5  | 161 | 121 |
| cop17-Br         | 2.09 | 1.91 | 3.74 | 7.5  | 80  | 172 |
| cop17-Br-relaxed | 2.10 | 1.92 | 3.69 | 8.6  | 80  | 172 |
| cop17-Cl         | 2.09 | 1.74 | 3.73 | 6.5  | 78  | 169 |
| cop17-Cl-relaxed | 2.10 | 1.75 | 3.64 | 7.4  | 76  | 171 |
| cop18-I          | 1.31 | 2.09 | 3.46 | 3.3  | 157 | 147 |
| cop18-I-relaxed  | 1.32 | 2.11 | 3.34 | 3.8  | 158 | 146 |
| cop18-Cl         | 1.30 | 1.74 | 3.39 | 3.6  | 154 | 141 |
| cop18-Cl-relaxed | 1.31 | 1.75 | 3.22 | 4.1  | 156 | 141 |
| cop19-I          | 1.31 | 2.09 | 3.46 | 3.3  | 157 | 147 |
| cop19-I-relaxed  | 1.32 | 2.11 | 3.34 | 3.8  | 158 | 146 |
| cop19-Br         | 1.31 | 1.90 | 3.41 | 4.1  | 156 | 145 |
| cop19-Br-relaxed | 1.32 | 1.92 | 3.25 | 4.1  | 158 | 144 |
| cop20-I          | 2.10 | 2.10 | 3.88 | 3.4  | 140 | 140 |
| cop20-I-relaxed  | 2.11 | 2.11 | 3.81 | 3.9  | 140 | 144 |
| cop20-Br         | 1.90 | 1.90 | 3.74 | 3.2  | 138 | 138 |
| cop20-Br-relaxed | 1.92 | 1.92 | 3.67 | 3.7  | 138 | 138 |
| cop21-I          | 2.10 | 2.10 | 3.88 | 3.4  | 140 | 140 |
| cop21-I-relaxed  | 2.11 | 2.11 | 3.81 | 3.9  | 140 | 144 |
| cop21-Cl         | 1.74 | 1.74 | 3.75 | 3.0  | 136 | 136 |
| cop21-Cl-relaxed | 1.75 | 1.75 | 3.68 | 3.4  | 135 | 135 |

### QTAIM

Table V: Topological Properties of electron and Energy density at BCP Between two Atoms Involved in halogen-involved Interaction in cop4-cop21

| Couple | Basis Set | Functional | $\rho_{BCP}$ | $\nabla^2\rho_{BCP}$ | $G_{BCP}$ | $V_{BCP}$ | $H_{BCP}$ | $ V_{BCP} /G_{BCP}$ |
|--------|-----------|------------|--------------|----------------------|-----------|-----------|-----------|---------------------|
|--------|-----------|------------|--------------|----------------------|-----------|-----------|-----------|---------------------|

|          |           |         |        |        |        |         |        |        |
|----------|-----------|---------|--------|--------|--------|---------|--------|--------|
| cop4-I   | Def2-TZVP | WB97X-D | 0.0120 | 0.0369 | 0.0078 | -0.0064 | 0.0014 | 0.8205 |
|          | Def2-TZVP | M062-X  | 0.0120 | 0.0378 | 0.0081 | -0.0067 | 0.0014 | 0.8272 |
| cop4-Cl  | Def2-TZVP | WB97X-D | 0.0055 | 0.0192 | 0.0036 | -0.0025 | 0.0011 | 0.6944 |
|          | Def2-TZVP | M062-X  | 0.0056 | 0.0192 | 0.0037 | -0.0026 | 0.0011 | 0.7027 |
| cop5-Br  | Def2-TZVP | WB97X-D | 0.0088 | 0.0292 | 0.0059 | -0.0046 | 0.0013 | 0.7797 |
|          | Def2-TZVP | M062-X  | 0.0089 | 0.0302 | 0.0061 | -0.0048 | 0.0013 | 0.7869 |
| cop5-Cl  | Def2-TZVP | WB97X-D | 0.0055 | 0.0192 | 0.0036 | -0.0025 | 0.0011 | 0.6944 |
|          | Def2-TZVP | M062-X  | 0.0056 | 0.0192 | 0.0037 | -0.0026 | 0.0011 | 0.7027 |
| cop6-Br  | Def2-TZVP | WB97X-D | 0.0068 | 0.0223 | 0.0044 | -0.0033 | 0.0011 | 0.7500 |
|          | Def2-TZVP | M062-X  | 0.0070 | 0.0230 | 0.0046 | -0.0034 | 0.0012 | 0.7391 |
| cop6-Cl  | Def2-TZVP | WB97X-D | 0.0051 | 0.0181 | 0.0034 | -0.0023 | 0.0011 | 0.6765 |
|          | Def2-TZVP | M062-X  | 0.0052 | 0.0182 | 0.0035 | -0.0024 | 0.0011 | 0.6857 |
| cop7-Br  | Def2-TZVP | WB97X-D | 0.0075 | 0.0228 | 0.0047 | -0.0037 | 0.0010 | 0.7872 |
|          | Def2-TZVP | M062-X  | 0.0077 | 0.0237 | 0.0049 | -0.0038 | 0.0011 | 0.7755 |
| cop7-Cl  | Def2-TZVP | WB97X-D | 0.0058 | 0.0199 | 0.0038 | -0.0027 | 0.0011 | 0.7105 |
|          | Def2-TZVP | M062-X  | 0.0060 | 0.0202 | 0.0039 | -0.0027 | 0.0011 | 0.7180 |
| cop8-Br  | Def2-TZVP | WB97X-D | 0.0075 | 0.0228 | 0.0047 | -0.0037 | 0.0010 | 0.7872 |
|          | Def2-TZVP | M062-X  | 0.0077 | 0.0237 | 0.0049 | -0.0038 | 0.0011 | 0.7755 |
| cop8-Cl  | Def2-TZVP | WB97X-D | 0.0051 | 0.0181 | 0.0034 | -0.0023 | 0.0011 | 0.6765 |
|          | Def2-TZVP | M062-X  | 0.0052 | 0.0182 | 0.0035 | -0.0024 | 0.0011 | 0.6857 |
| cop9-Br  | Def2-TZVP | WB97X-D | 0.0068 | 0.0223 | 0.0044 | -0.0033 | 0.0011 | 0.7500 |
|          | Def2-TZVP | M062-X  | 0.0070 | 0.0230 | 0.0046 | -0.0034 | 0.0012 | 0.7391 |
| cop9-Cl  | Def2-TZVP | WB97X-D | 0.0058 | 0.0199 | 0.0038 | -0.0027 | 0.0011 | 0.7105 |
|          | Def2-TZVP | M062-X  | 0.0060 | 0.0202 | 0.0039 | -0.0027 | 0.0011 | 0.7180 |
| cop10-Br | Def2-TZVP | WB97X-D | 0.0077 | 0.0210 | 0.0044 | -0.0035 | 0.0009 | 0.7954 |
|          | Def2-TZVP | M062-X  | 0.0077 | 0.0219 | 0.0046 | -0.0036 | 0.0010 | 0.7826 |
| cop10-Cl | Def2-TZVP | WB97X-D | 0.0057 | 0.0179 | 0.0035 | -0.0024 | 0.0011 | 0.6857 |
|          | Def2-TZVP | M062-X  | 0.0057 | 0.0181 | 0.0035 | -0.0025 | 0.0010 | 0.7143 |
| cop11-Br | Def2-TZVP | WB97X-D | 0.0079 | 0.0221 | 0.0047 | -0.0038 | 0.0009 | 0.8085 |
|          | Def2-TZVP | M062-X  | 0.0080 | 0.0223 | 0.0049 | -0.0039 | 0.0010 | 0.7959 |
| cop11-F  | Def2-TZVP | WB97X-D | 0.0053 | 0.0210 | 0.0040 | -0.0028 | 0.0012 | 0.7000 |
|          | Def2-TZVP | M062-X  | 0.0054 | 0.0215 | 0.0042 | -0.0030 | 0.0012 | 0.7143 |
| cop12-I  | Def2-TZVP | WB97X-D | 0.0079 | 0.0207 | 0.0044 | -0.0036 | 0.0008 | 0.8182 |
|          | Def2-TZVP | M062-X  | 0.0080 | 0.0214 | 0.0045 | -0.0037 | 0.0008 | 0.8222 |
| cop12-F  | Def2-TZVP | WB97X-D | 0.0053 | 0.0210 | 0.0040 | -0.0028 | 0.0012 | 0.7000 |
|          | Def2-TZVP | M062-X  | 0.0054 | 0.0215 | 0.0042 | -0.0030 | 0.0012 | 0.7143 |
| cop13-I  | Def2-TZVP | WB97X-D | 0.0079 | 0.0207 | 0.0044 | -0.0036 | 0.0008 | 0.8182 |
|          | Def2-TZVP | M062-X  | 0.0080 | 0.0214 | 0.0045 | -0.0037 | 0.0008 | 0.8222 |
| cop13-Cl | Def2-TZVP | WB97X-D | 0.0066 | 0.0211 | 0.0042 | -0.0031 | 0.0011 | 0.7381 |
|          | Def2-TZVP | M062-X  | 0.0067 | 0.0214 | 0.0043 | -0.0032 | 0.0011 | 0.7442 |
| cop14-Br | Def2-TZVP | WB97X-D | 0.0085 | 0.0259 | 0.0054 | -0.0044 | 0.0010 | 0.8148 |
|          | Def2-TZVP | M062-X  | 0.0087 | 0.0268 | 0.0056 | -0.0046 | 0.0010 | 0.8214 |
| cop14-Cl | Def2-TZVP | WB97X-D | 0.0062 | 0.0229 | 0.0043 | -0.0030 | 0.0013 | 0.6977 |
|          | Def2-TZVP | M062-X  | 0.0063 | 0.0229 | 0.0044 | -0.0031 | 0.0013 | 0.7045 |
| cop15-Br | Def2-TZVP | WB97X-D | 0.0085 | 0.0312 | 0.0063 | -0.0048 | 0.0015 | 0.7619 |
|          | Def2-TZVP | M062-X  | 0.0087 | 0.0319 | 0.0065 | -0.0051 | 0.0014 | 0.7846 |
| cop15-Cl | Def2-TZVP | WB97X-D | 0.0048 | 0.0185 | 0.0035 | -0.0023 | 0.0012 | 0.6571 |
|          | Def2-TZVP | M062-X  | 0.0049 | 0.0187 | 0.0035 | -0.0024 | 0.0011 | 0.6857 |
| cop16-Br | Def2-TZVP | WB97X-D | 0.0076 | 0.0243 | 0.0049 | -0.0037 | 0.0012 | 0.7551 |
|          | Def2-TZVP | M062-X  | 0.0077 | 0.0259 | 0.0050 | -0.0038 | 0.0012 | 0.7600 |
| cop16-Cl | Def2-TZVP | WB97X-D | 0.0055 | 0.0192 | 0.0036 | -0.0025 | 0.0011 | 0.6944 |
|          | Def2-TZVP | M062-X  | 0.0056 | 0.0192 | 0.0037 | -0.0026 | 0.0011 | 0.7027 |
| cop17-Br | Def2-TZVP | WB97X-D | 0.0079 | 0.0221 | 0.0047 | -0.0038 | 0.0009 | 0.8085 |
|          | Def2-TZVP | M062-X  | 0.0080 | 0.0223 | 0.0049 | -0.0039 | 0.0010 | 0.7959 |
| cop17-Cl | Def2-TZVP | WB97X-D | 0.0066 | 0.0211 | 0.0042 | -0.0031 | 0.0011 | 0.7381 |
|          | Def2-TZVP | M062-X  | 0.0067 | 0.0214 | 0.0043 | -0.0032 | 0.0011 | 0.7442 |
| cop18-I  | Def2-TZVP | WB97X-D | 0.0062 | 0.0222 | 0.0044 | -0.0032 | 0.0012 | 0.7272 |
|          | Def2-TZVP | M062-X  | 0.0064 | 0.0229 | 0.0046 | -0.0034 | 0.0012 | 0.7391 |
| cop18-Cl | Def2-TZVP | WB97X-D | 0.0044 | 0.0148 | 0.0034 | -0.0022 | 0.0012 | 0.6470 |
|          | Def2-TZVP | M062-X  | 0.0046 | 0.0150 | 0.0036 | -0.0023 | 0.0013 | 0.6389 |
| cop19-I  | Def2-TZVP | WB97X-D | 0.0062 | 0.0222 | 0.0044 | -0.0032 | 0.0012 | 0.7272 |
|          | Def2-TZVP | M062-X  | 0.0064 | 0.0229 | 0.0046 | -0.0034 | 0.0012 | 0.7391 |

|          |           |         |        |        |        |         |        |        |
|----------|-----------|---------|--------|--------|--------|---------|--------|--------|
| cop19-Br | Def2-TZVP | WB97X-D | 0.0053 | 0.0205 | 0.0040 | -0.0028 | 0.0012 | 0.7000 |
|          | Def2-TZVP | M062-X  | 0.0055 | 0.0210 | 0.0041 | -0.0029 | 0.0012 | 0.7073 |
| cop20-I  | Def2-TZVP | WB97X-D | 0.0080 | 0.0196 | 0.0042 | -0.0035 | 0.0007 | 0.8333 |
|          | Def2-TZVP | M062-X  | 0.0082 | 0.0201 | 0.0044 | -0.0036 | 0.0008 | 0.8181 |
| cop20-Br | Def2-TZVP | WB97X-D | 0.0062 | 0.0189 | 0.0038 | -0.0029 | 0.0009 | 0.7632 |
|          | Def2-TZVP | M062-X  | 0.0064 | 0.0195 | 0.0040 | -0.0030 | 0.0010 | 0.7500 |
| cop21-I  | Def2-TZVP | WB97X-D | 0.0080 | 0.0196 | 0.0042 | -0.0035 | 0.0007 | 0.8333 |
|          | Def2-TZVP | M062-X  | 0.0082 | 0.0201 | 0.0044 | -0.0036 | 0.0008 | 0.8181 |
| cop21-Cl | Def2-TZVP | WB97X-D | 0.0038 | 0.0135 | 0.0025 | -0.0016 | 0.0009 | 0.6400 |
|          | Def2-TZVP | M062-X  | 0.0039 | 0.0139 | 0.0027 | -0.0017 | 0.0010 | 0.6296 |

## EDA

Table VI: The interaction energy and its components based on EDA analysis for cop4-cop21-all energy units is (Kj/mol)

| Couple         | Functional | Basis set | $\Delta E_{int}$ | $\Delta E_{elstat}$ | $\Delta E_{pauli}$ | $\Delta E_{orb}$ | $\Delta E_{disp}$ |
|----------------|------------|-----------|------------------|---------------------|--------------------|------------------|-------------------|
| cop4-I-dimer   | B3LYP-D    | TZP       | -44.13           | -65.20              | 87.66              | -34.04           | -32.55            |
| cop4-Cl-dimer  | B3LYP-D    | TZP       | -31.32           | -26.02              | 30.96              | -12.49           | -23.77            |
| cop5-Br-dimer  | B3LYP-D    | TZP       | -32.96           | -32.38              | 44.56              | -19.21           | -25.93            |
| cop5-Cl-dimer  | B3LYP-D    | TZP       | -31.32           | -26.02              | 30.96              | -12.49           | -23.77            |
| cop6-Br-dimer  | B3LYP-D    | TZP       | -15.92           | -9.60               | 15.55              | -8.69            | -13.18            |
| cop6-Cl-dimer  | B3LYP-D    | TZP       | -9.36            | -3.52               | 9.50               | -4.88            | -10.46            |
| cop7-Br-dimer  | B3LYP-D    | TZP       | -15.52           | -10.47              | 16.68              | -8.94            | -12.80            |
| cop7-Cl-dimer  | B3LYP-D    | TZP       | -9.29            | -4.99               | 10.49              | -4.92            | -9.87             |
| cop8-Br-dimer  | B3LYP-D    | TZP       | -15.52           | -10.47              | 16.68              | -8.94            | -12.80            |
| cop8-Cl-dimer  | B3LYP-D    | TZP       | -9.36            | -3.52               | 9.50               | -4.88            | -10.46            |
| cop9-Br-dimer  | B3LYP-D    | TZP       | -15.92           | -9.60               | 15.55              | -8.69            | -13.18            |
| cop9-Cl-dimer  | B3LYP-D    | TZP       | -9.29            | -4.99               | 10.49              | -4.92            | -9.87             |
| cop10-Br-dimer | B3LYP-D    | TZP       | -13.35           | -11.18              | 17.04              | -8.27            | -10.94            |
| cop10-Cl-dimer | B3LYP-D    | TZP       | -7.42            | -5.41               | 10.26              | -4.00            | -8.27             |
| cop11-Br-dimer | B3LYP-D    | TZP       | -8.12            | -8.36               | 17.31              | -6.14            | -10.93            |
| cop11-F-dimer  | B3LYP-D    | TZP       | -8.46            | -5.16               | 9.88               | -2.89            | -10.29            |
| cop12-I-dimer  | B3LYP-D    | TZP       | -9.03            | -9.88               | 19.87              | -6.44            | -12.58            |
| cop12-F-dimer  | B3LYP-D    | TZP       | -8.46            | -5.16               | 9.88               | -2.89            | -10.29            |
| cop13-I-dimer  | B3LYP-D    | TZP       | -9.03            | -9.88               | 19.87              | -6.44            | -12.58            |
| cop13-Cl-dimer | B3LYP-D    | TZP       | -5.14            | -5.62               | 13.12              | -3.66            | -8.98             |
| cop14-Br-dimer | B3LYP-D    | TZP       | -33.26           | -22.23              | 39.18              | -12.16           | -38.04            |
| cop14-Cl-dimer | B3LYP-D    | TZP       | -30.53           | -16.97              | 28.92              | -8.61            | -33.87            |
| cop15-Br-dimer | B3LYP-D    | TZP       | -29.42           | -27.55              | 48.43              | -12.01           | -38.29            |
| cop15-Cl-dimer | B3LYP-D    | TZP       | -27.14           | -17.38              | 22.06              | -7.13            | -24.69            |
| cop16-Br-dimer | B3LYP-D    | TZP       | -38.29           | -32.74              | 37.59              | -16.38           | -26.75            |
| cop16-Cl-dimer | B3LYP-D    | TZP       | -31.32           | -26.02              | 30.96              | -12.49           | -23.77            |
| cop17-Br-dimer | B3LYP-D    | TZP       | -8.12            | -8.36               | 17.31              | -6.14            | -10.93            |
| cop17-Cl-dimer | B3LYP-D    | TZP       | -5.14            | -5.62               | 13.12              | -3.66            | -8.98             |
| cop18-I-dimer  | B3LYP-D    | TZP       | -15.84           | -14.32              | 26.54              | -6.33            | -21.72            |
| cop18-Cl-dimer | B3LYP-D    | TZP       | -10.74           | -7.80               | 12.20              | -2.92            | -12.22            |
| cop19-I-dimer  | B3LYP-D    | TZP       | -15.84           | -14.32              | 26.54              | -6.33            | -21.72            |
| cop19-Br-dimer | B3LYP-D    | TZP       | -15.41           | -10.48              | 16.79              | -5.48            | -16.25            |
| cop20-I-dimer  | B3LYP-D    | TZP       | -3.37            | -9.17               | 18.25              | -4.71            | -7.75             |
| cop20-Br-dimer | B3LYP-D    | TZP       | -4.21            | -4.07               | 8.36               | -3.08            | -5.42             |
| cop21-I-dimer  | B3LYP-D    | TZP       | -3.37            | -9.17               | 18.25              | -4.71            | -7.75             |
| cop21-Cl-dimer | B3LYP-D    | TZP       | -1.52            | -0.93               | 3.43               | -0.88            | -3.13             |

---
